# Supplementary material for: Vectorial secretion of interleukin-8 mediates autocrine signalling in intestinal epithelial cells via apically located CXCR1
Source: PubMed Central journal article supplement (PMC4231470; doi:10.1186/1756-0500-6-431), 2013-10-28

Jan 22, 10 14:50

quality\_report\_2010\_01\_22.txt

Page 1/1

Quality control report (BEFORE normalization only).  
 Date: Fri Jan 22 14:50:16 2010 / BioConductor version: 2.4 (R-2.9.0) / Platform: Linux / simpleaffy version: 2.20.0-1.  
 Scaling: target intensity (tgt) is: 100.000000

gapdh3 probeset is: AFFX-HUMGAPDH/M33197\_3\_at  
 gapdhM probeset is: AFFX-HUMGAPDH/M33197\_M\_at  
 gapdh5 probeset is: AFFX-HUMGAPDH/M33197\_5\_at  
 actin3 probeset is: AFFX-HSAC07/X00351\_3\_at  
 actinM probeset is: AFFX-HSAC07/X00351\_M\_at  
 actin5 probeset is: AFFX-HSAC07/X00351\_5\_at

| Loaded Files    | scaling factors | % present | average backgr. | minimum backgr. | maximum backgr. | BioB signal | BioB P/A | BioC signal | BioC P/A | BioD signal | BioD P/A | CreX signal | CreX P/A |
|-----------------|-----------------|-----------|-----------------|-----------------|-----------------|-------------|----------|-------------|----------|-------------|----------|-------------|----------|
| Caco2-1.CEL     | 0.6103          | 47.3544   | 54.7234         | 52.2253         | 56.5260         | 8.3638      | P        | 9.9410      | P        | 12.2111     | P        | 13.4152     | P        |
| Caco2-2.CEL     | 0.6150          | 47.6653   | 53.6337         | 51.1771         | 55.1821         | 8.2272      | P        | 9.9113      | P        | 12.1652     | P        | 13.3054     | P        |
| Caco2-3.CEL     | 0.6102          | 46.1289   | 54.1638         | 51.8753         | 57.3492         | 8.2311      | P        | 9.8927      | P        | 12.1266     | P        | 13.3543     | P        |
| Caco2-IL8-1.CEL | 0.5200          | 48.7956   | 53.3060         | 51.5514         | 55.2819         | 8.4017      | P        | 9.9270      | P        | 12.1741     | P        | 13.2812     | P        |
| Caco2-IL8-2.CEL | 0.5487          | 48.3036   | 61.8904         | 59.4238         | 63.2917         | 8.3461      | P        | 9.8889      | P        | 12.1324     | P        | 13.3358     | P        |
| Caco2-IL8-3.CEL | 0.6237          | 46.7051   | 55.0188         | 52.0831         | 56.8531         | 8.3688      | P        | 10.0140     | P        | 12.2660     | P        | 13.4268     | P        |

| Loaded Files    | gapdh3 signal | gapdh3 P/A | gapdhM signal | gapdhM P/A | gapdh5 signal | gapdh5 P/A | actin3 signal | actin3 P/A | actinM signal | actinM P/A | actin5 signal | actin5 P/A |
|-----------------|---------------|------------|---------------|------------|---------------|------------|---------------|------------|---------------|------------|---------------|------------|
| Caco2-1.CEL     | 12.7646       | P          | 12.6245       | P          | 12.7547       | P          | 12.3206       | P          | 11.6051       | P          | 10.8000       | P          |
| Caco2-2.CEL     | 12.7723       | P          | 12.6646       | P          | 12.7802       | P          | 12.3700       | P          | 11.6432       | P          | 10.6505       | P          |
| Caco2-3.CEL     | 12.7702       | P          | 12.6400       | P          | 12.7123       | P          | 12.2459       | P          | 11.4625       | P          | 10.4529       | P          |
| Caco2-IL8-1.CEL | 12.6162       | P          | 12.4308       | P          | 12.5965       | P          | 12.1860       | P          | 11.5492       | P          | 10.9707       | P          |
| Caco2-IL8-2.CEL | 12.6491       | P          | 12.4776       | P          | 12.6260       | P          | 12.3079       | P          | 11.6684       | P          | 10.8873       | P          |
| Caco2-IL8-3.CEL | 12.7866       | P          | 12.6706       | P          | 12.7594       | P          | 12.3469       | P          | 11.6768       | P          | 10.8479       | P          |

Quality Overview Plot.  
Fri Jan 22 14:50:23 2010

- △ actin3/actin5
- gapdh3/gapdh5

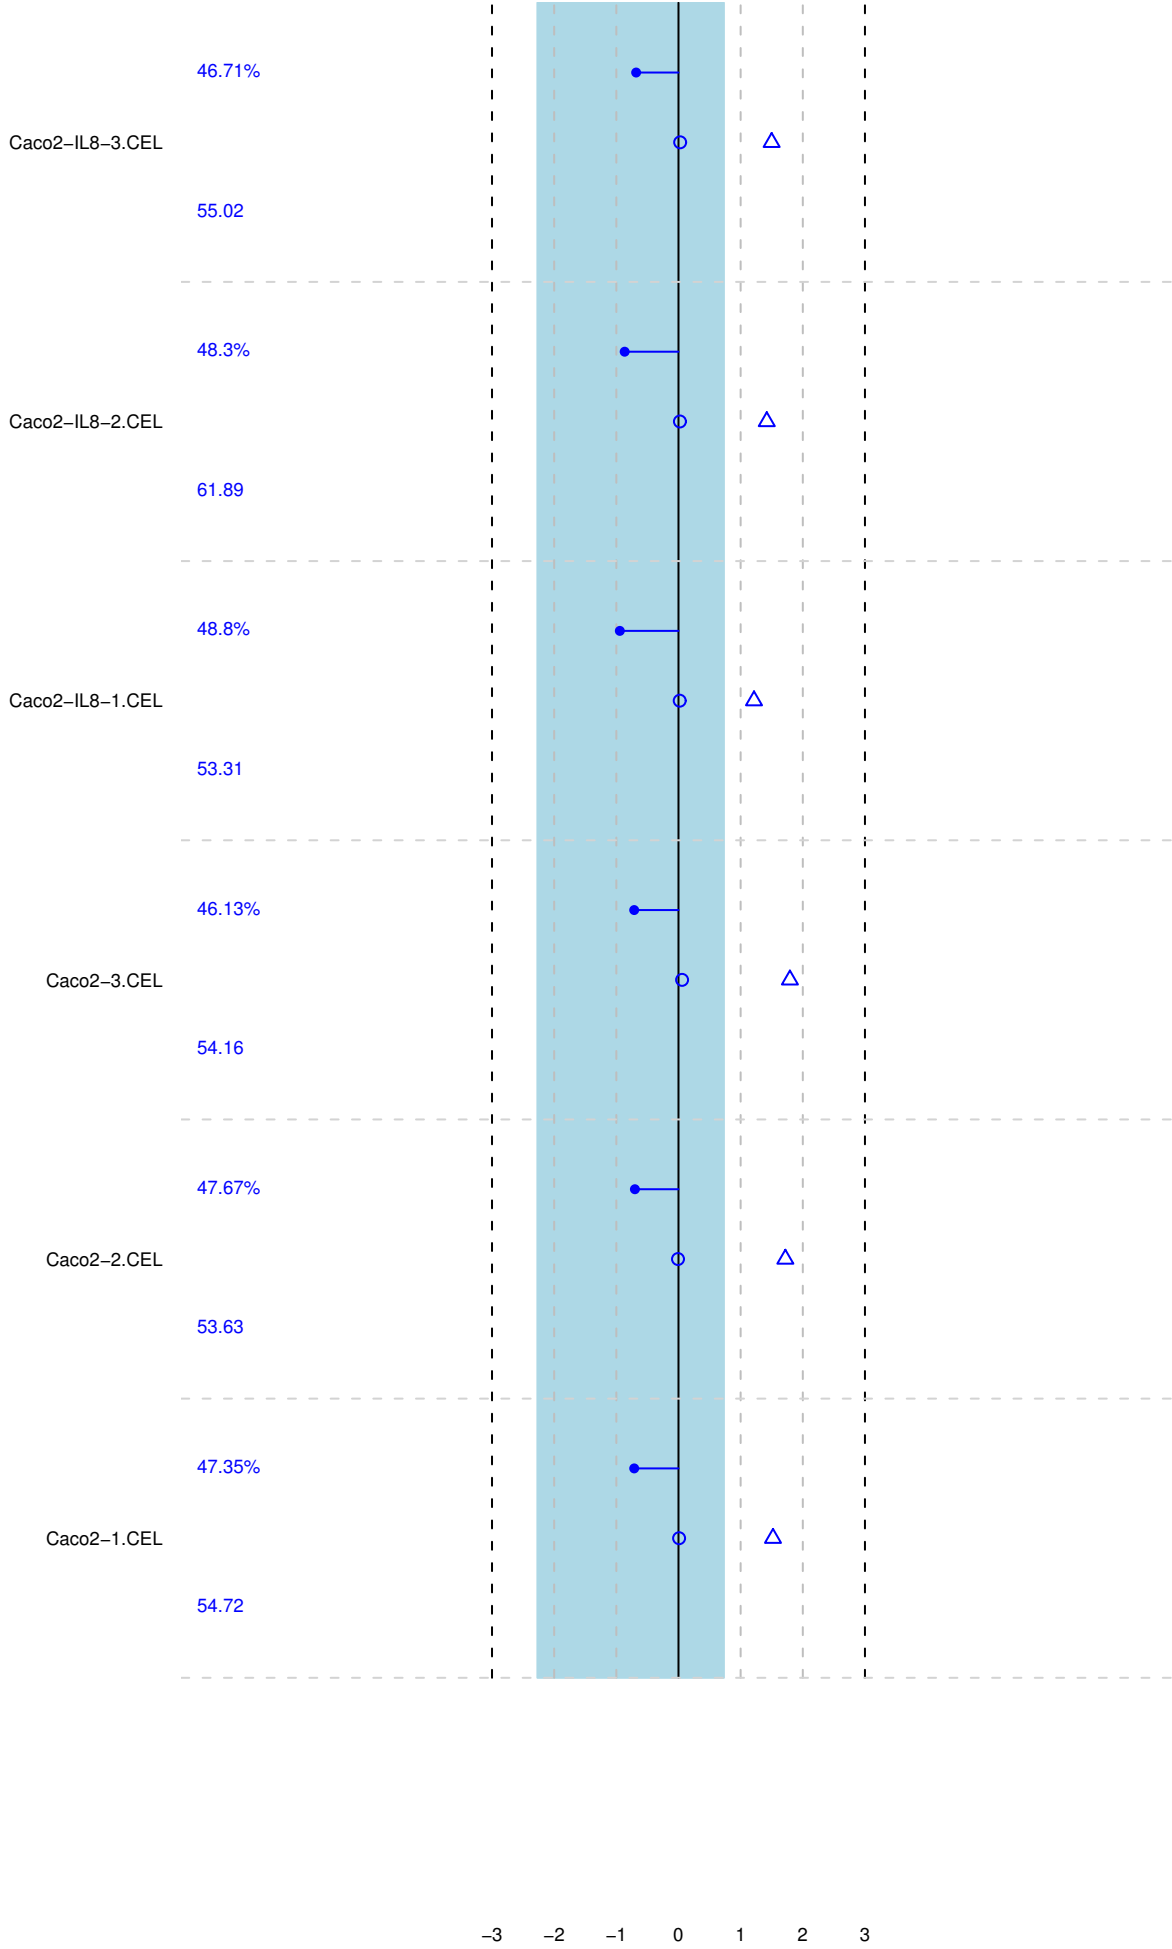

**Caco2-1.CEL**

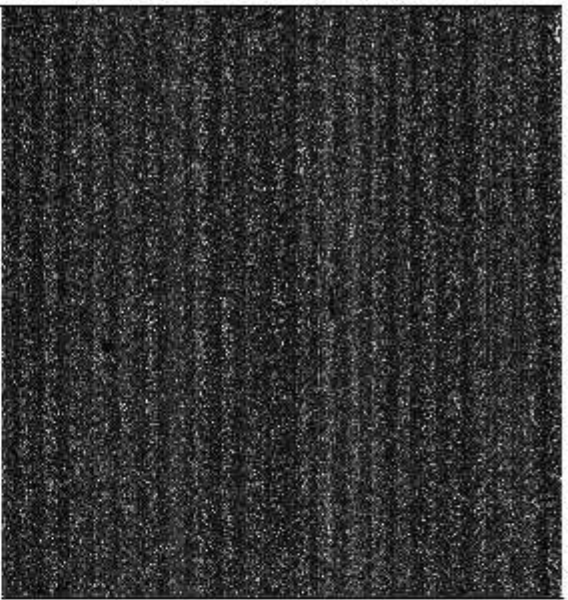

Raw image plot: 1/6 (Fri Jan 22 14:50:36 2010)

**Caco2-1L8-1.CEL**

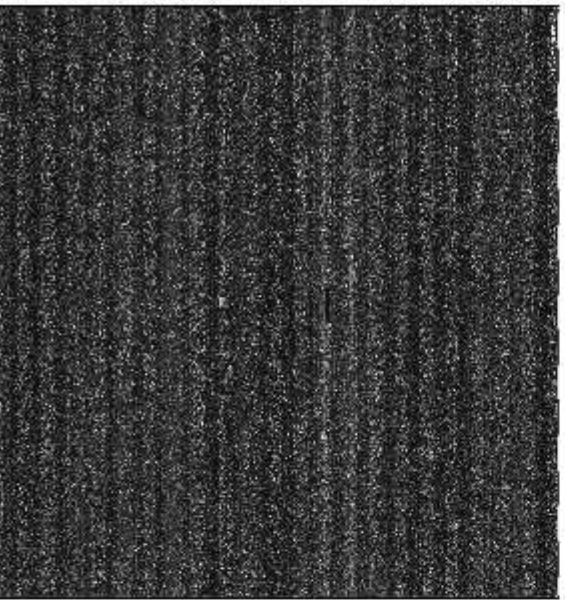

Raw image plot: 4/6 (Fri Jan 22 14:51:07 2010)

**Caco2-2.CEL**

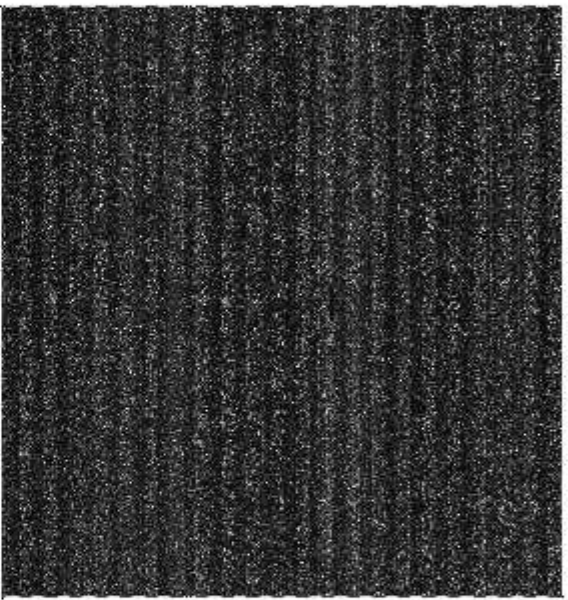

Raw image plot: 2/6 (Fri Jan 22 14:50:46 2010)

**Caco2-1L8-2.CEL**

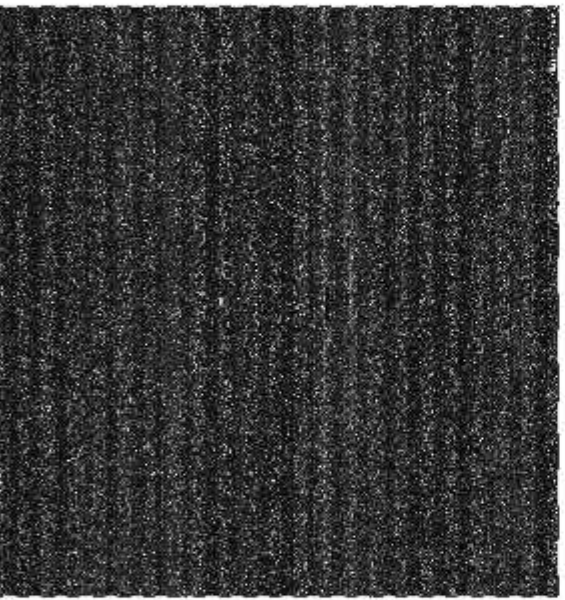

Raw image plot: 5/6 (Fri Jan 22 14:51:17 2010)

**Caco2-3.CEL**

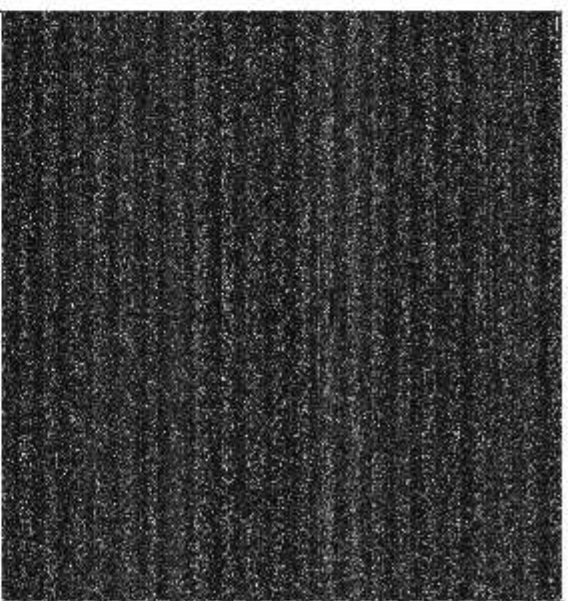

Raw image plot: 3/6 (Fri Jan 22 14:50:57 2010)

**Caco2-1L8-3.CEL**

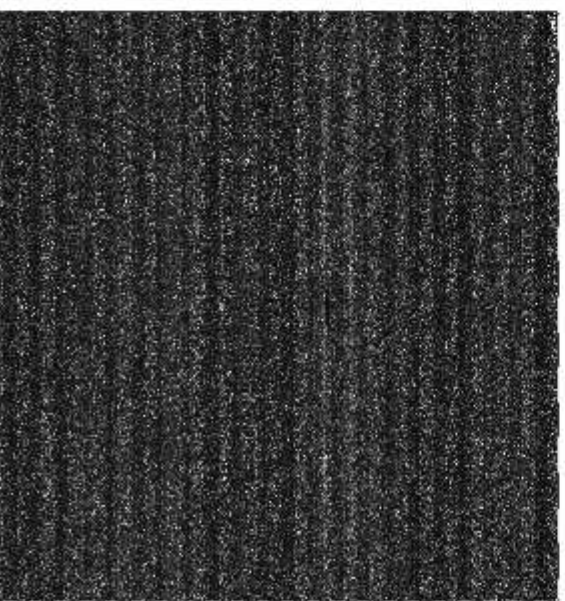

Raw image plot: 6/6 (Fri Jan 22 14:51:28 2010)



**Caco2-1.CEL**

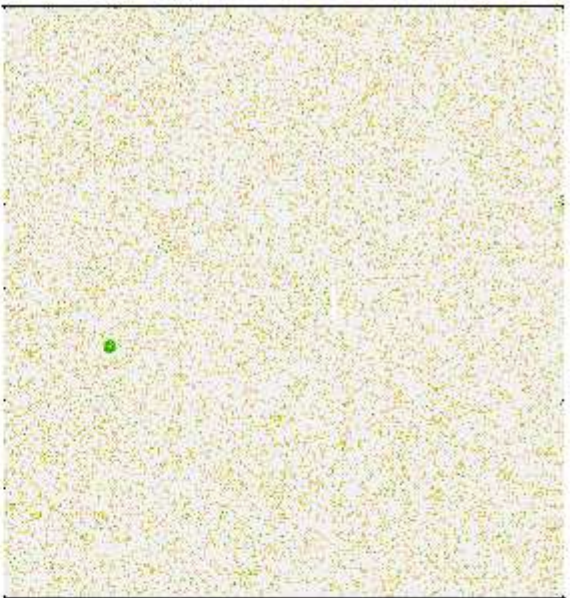

fitPLM weight image plot: 1/6 (Fri Jan 22 14:52:20 2010)

**Caco2-IL8-1.CEL**

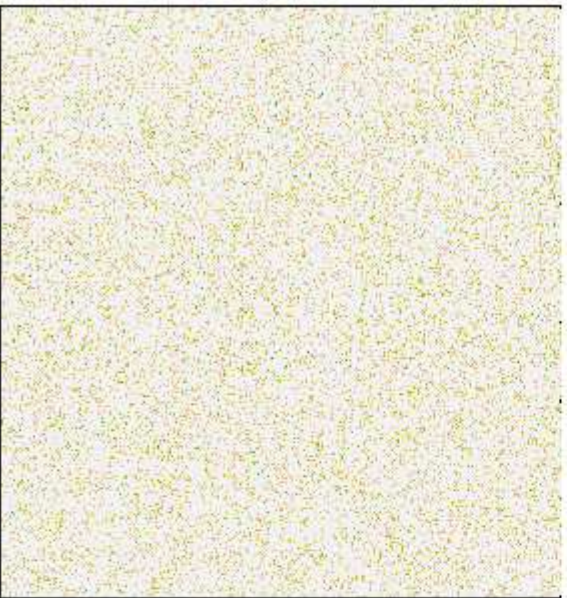

fitPLM weight image plot: 4/6 (Fri Jan 22 14:52:43 2010)

**Caco2-2.CEL**

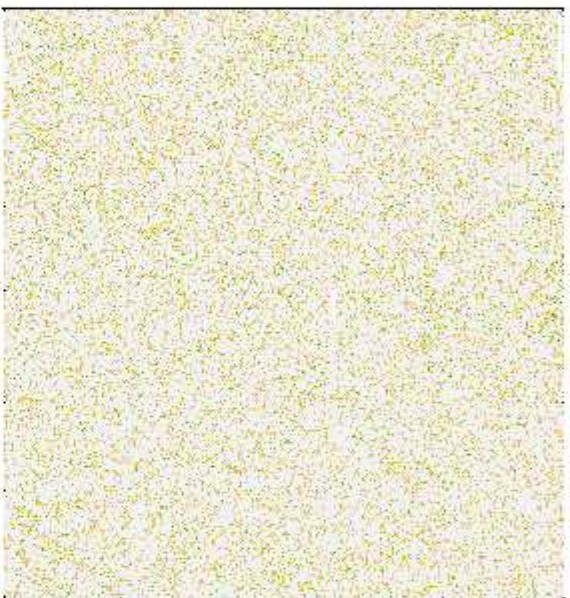

fitPLM weight image plot: 2/6 (Fri Jan 22 14:52:29 2010)

**Caco2-IL8-2.CEL**

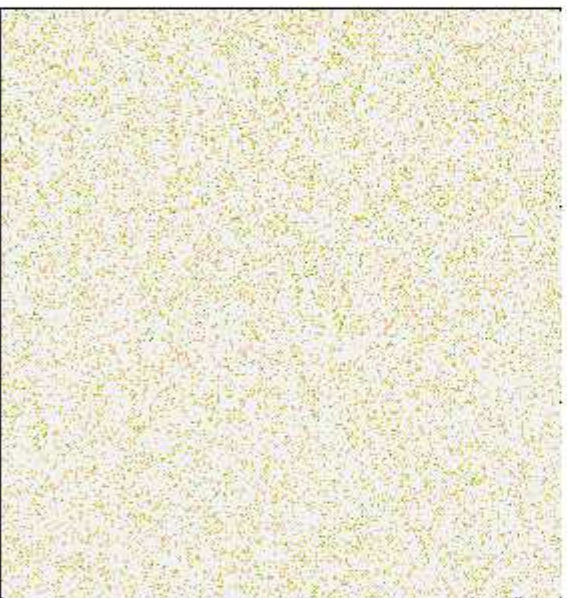

fitPLM weight image plot: 5/6 (Fri Jan 22 14:52:50 2010)

**Caco2-3.CEL**

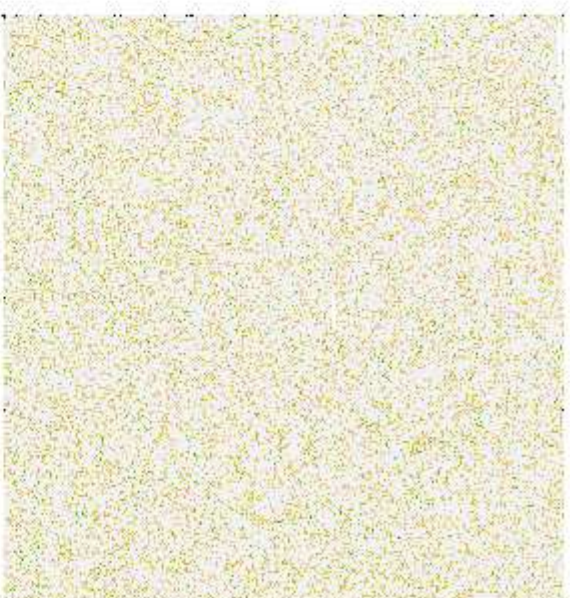

fitPLM weight image plot: 3/6 (Fri Jan 22 14:52:36 2010)

**Caco2-IL8-3.CEL**

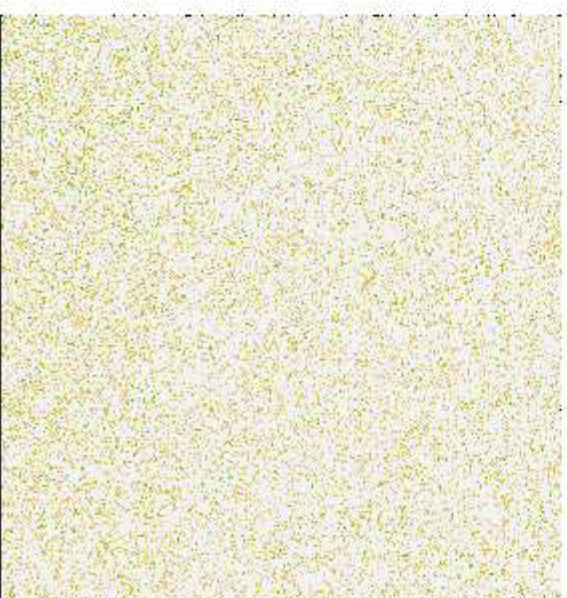

fitPLM weight image plot: 6/6 (Fri Jan 22 14:52:59 2010)



**Caco2-1.CEL**

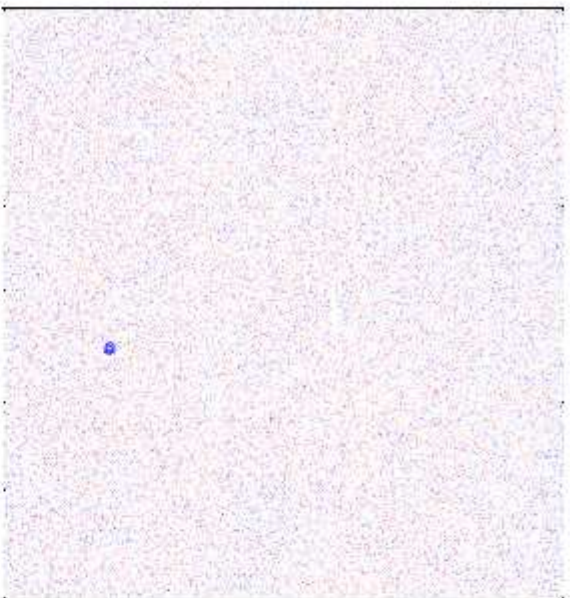

fitPLM residuals image plot: 1/6 (Fri Jan 22 14:53:09 2010)

**Caco2-IL8-1.CEL**

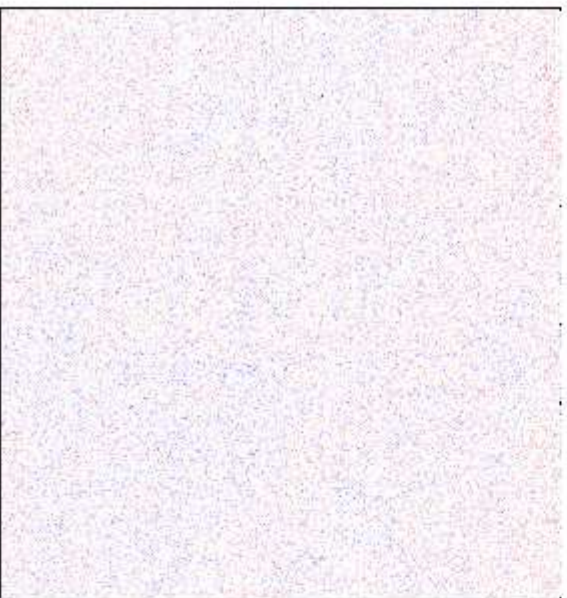

fitPLM residuals image plot: 4/6 (Fri Jan 22 14:53:34 2010)

**Caco2-2.CEL**

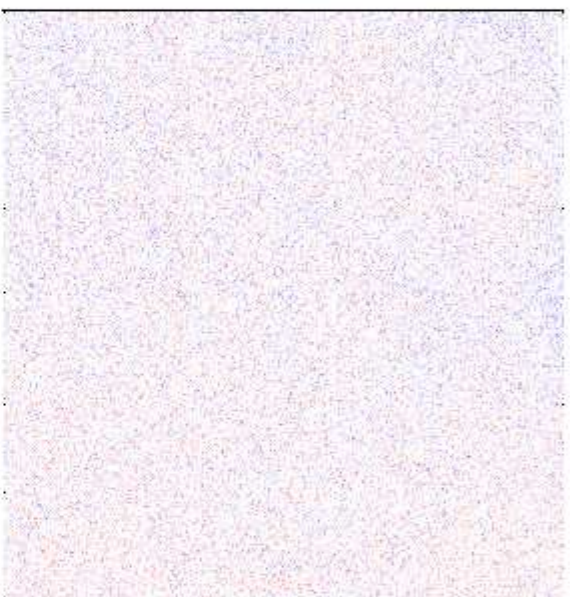

fitPLM residuals image plot: 2/6 (Fri Jan 22 14:53:17 2010)

**Caco2-IL8-2.CEL**

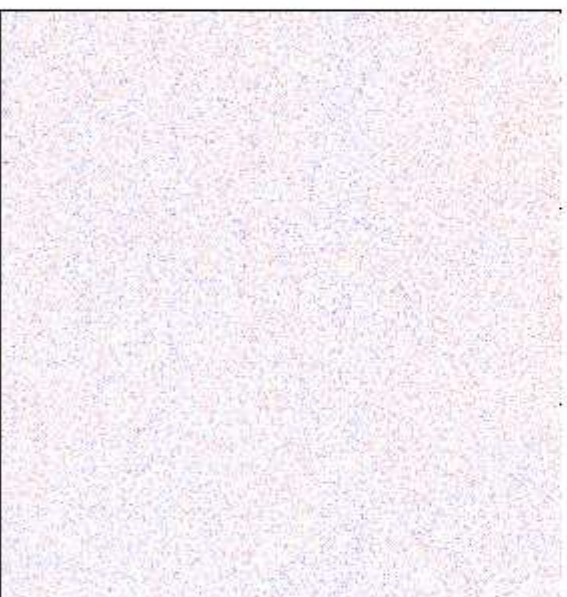

fitPLM residuals image plot: 5/6 (Fri Jan 22 14:53:41 2010)

**Caco2-3.CEL**

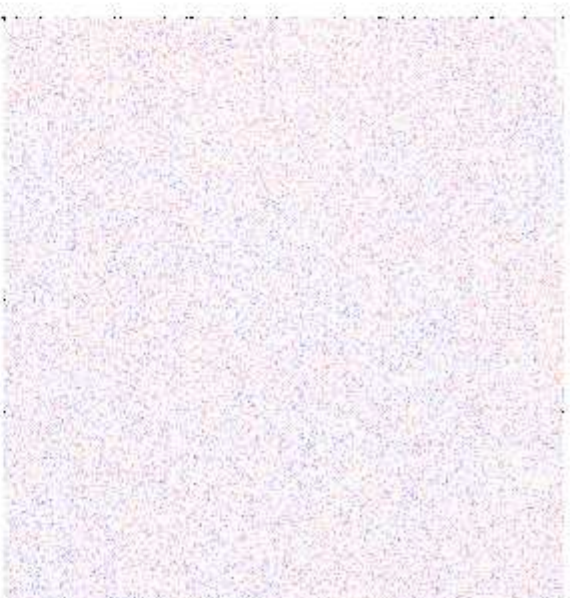

fitPLM residuals image plot: 3/6 (Fri Jan 22 14:53:25 2010)

**Caco2-IL8-3.CEL**

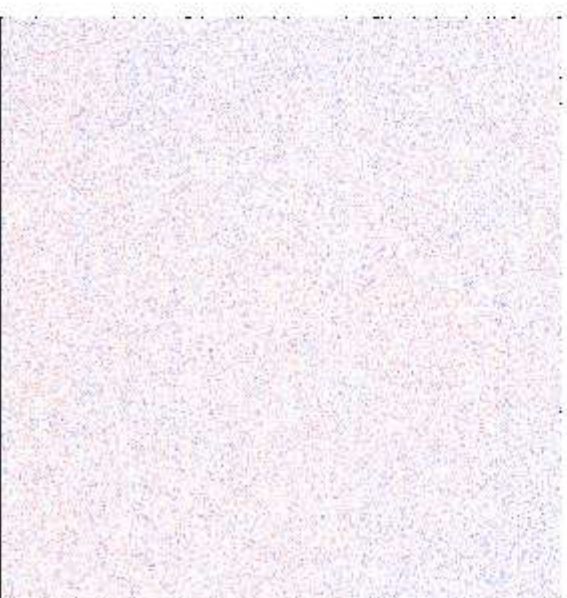

fitPLM residuals image plot: 6/6 (Fri Jan 22 14:53:49 2010)

Density plot (1/1) BEFORE normalization. Date: Fri Jan 22 15:01:29 2010

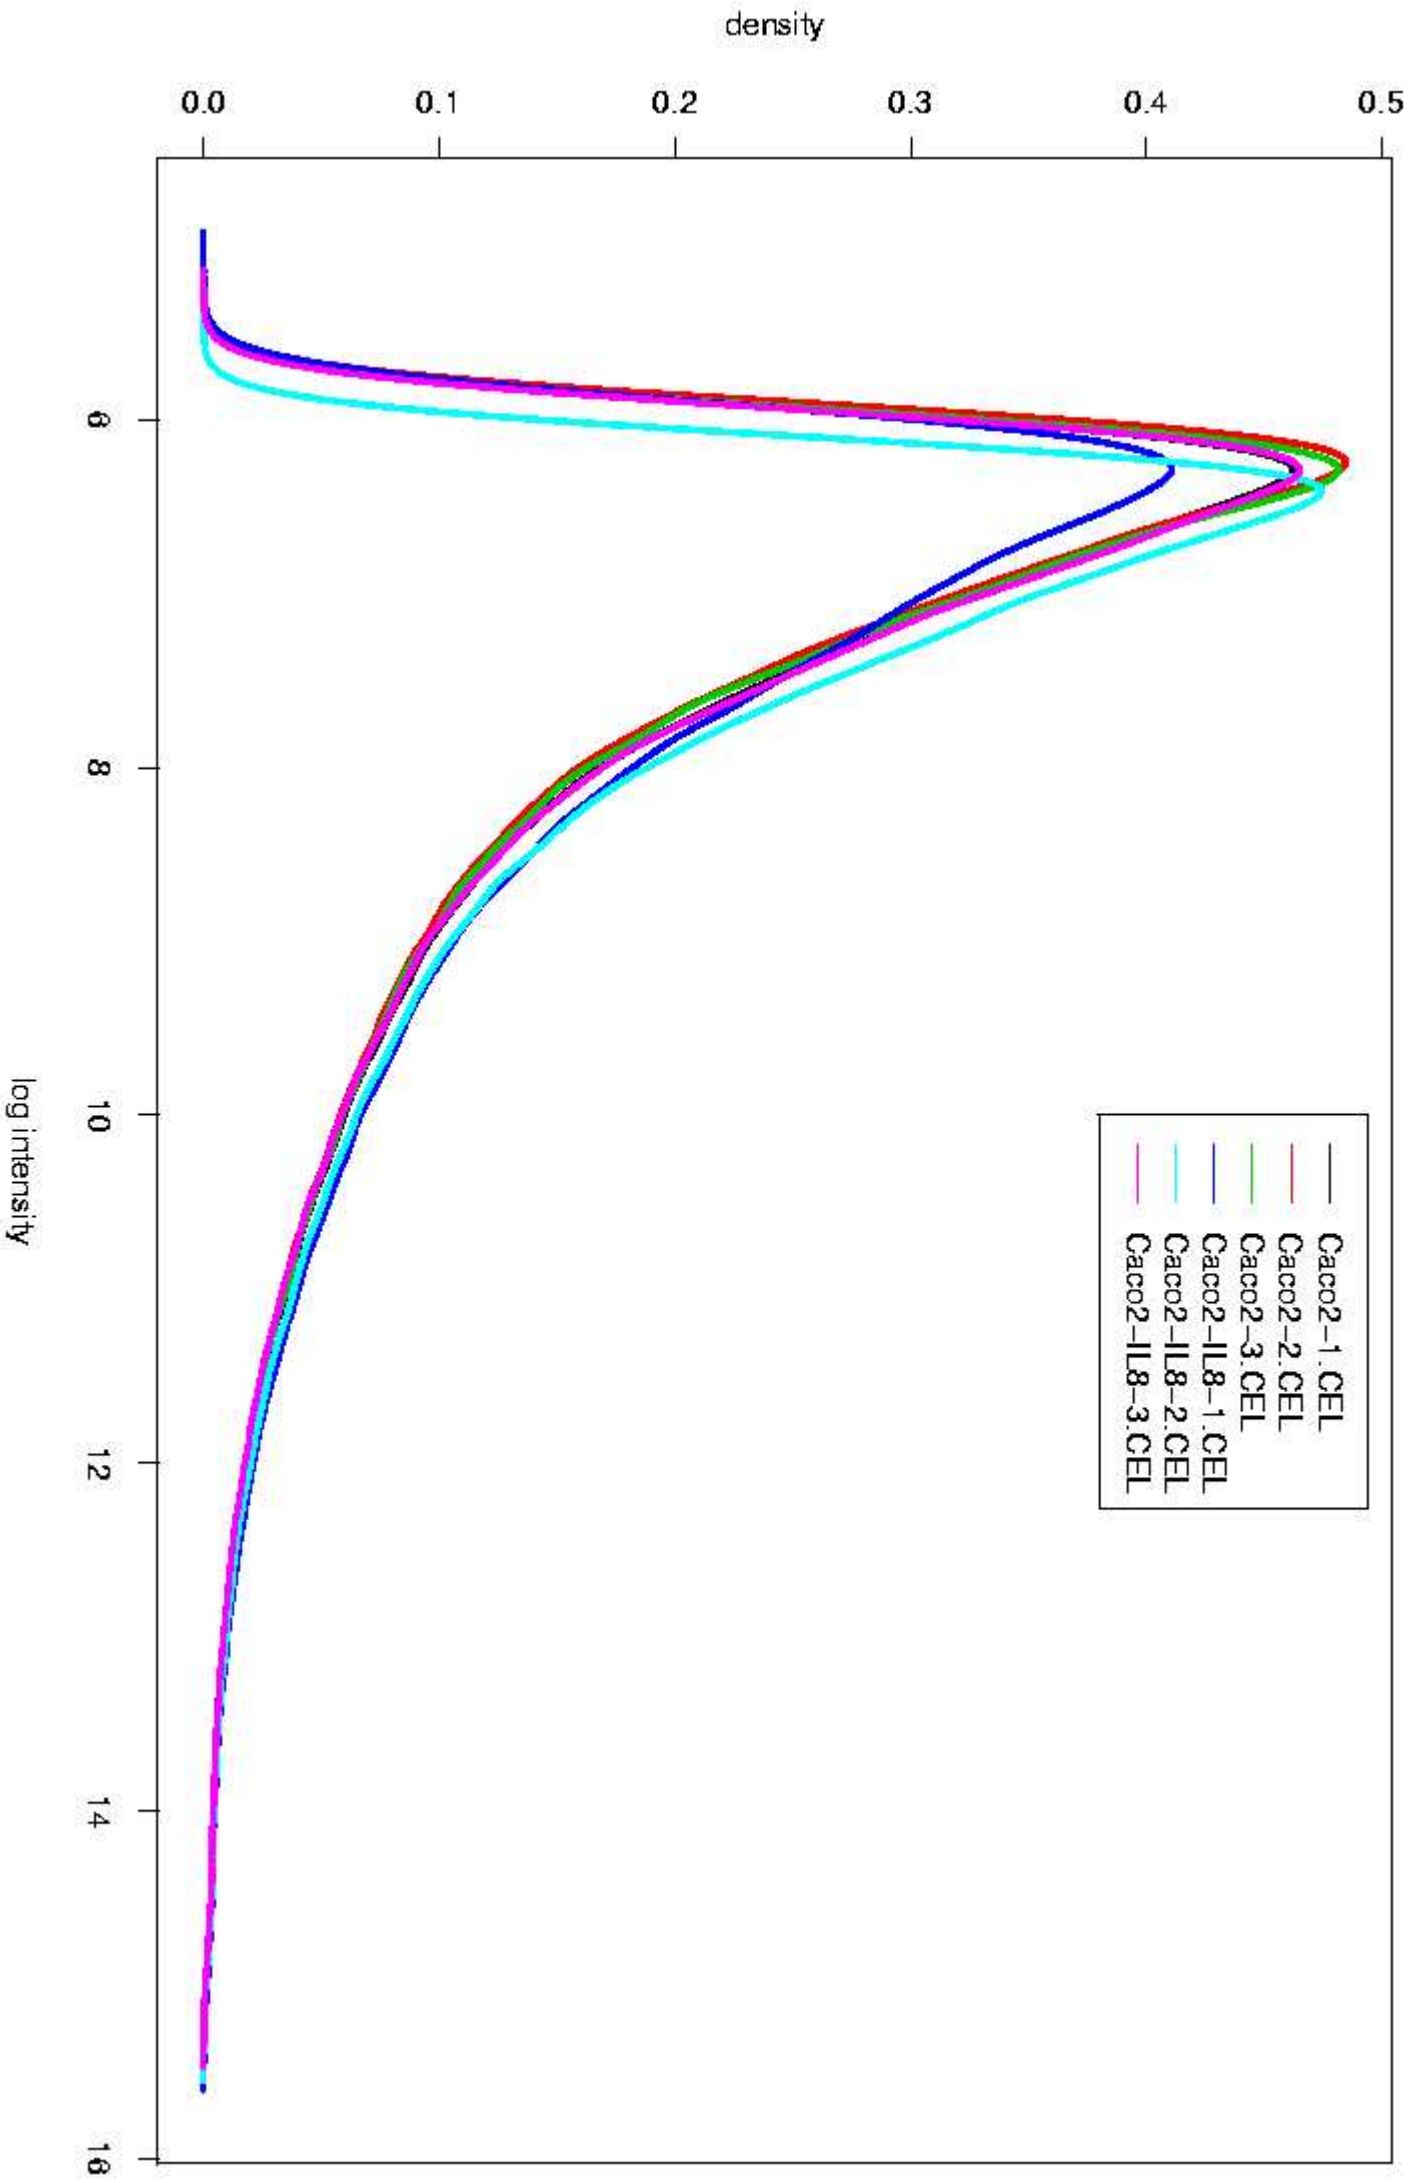



Density plot of ALL arrays BEFORE normalization. Date: Fri Jan 22 15:01:37 2010

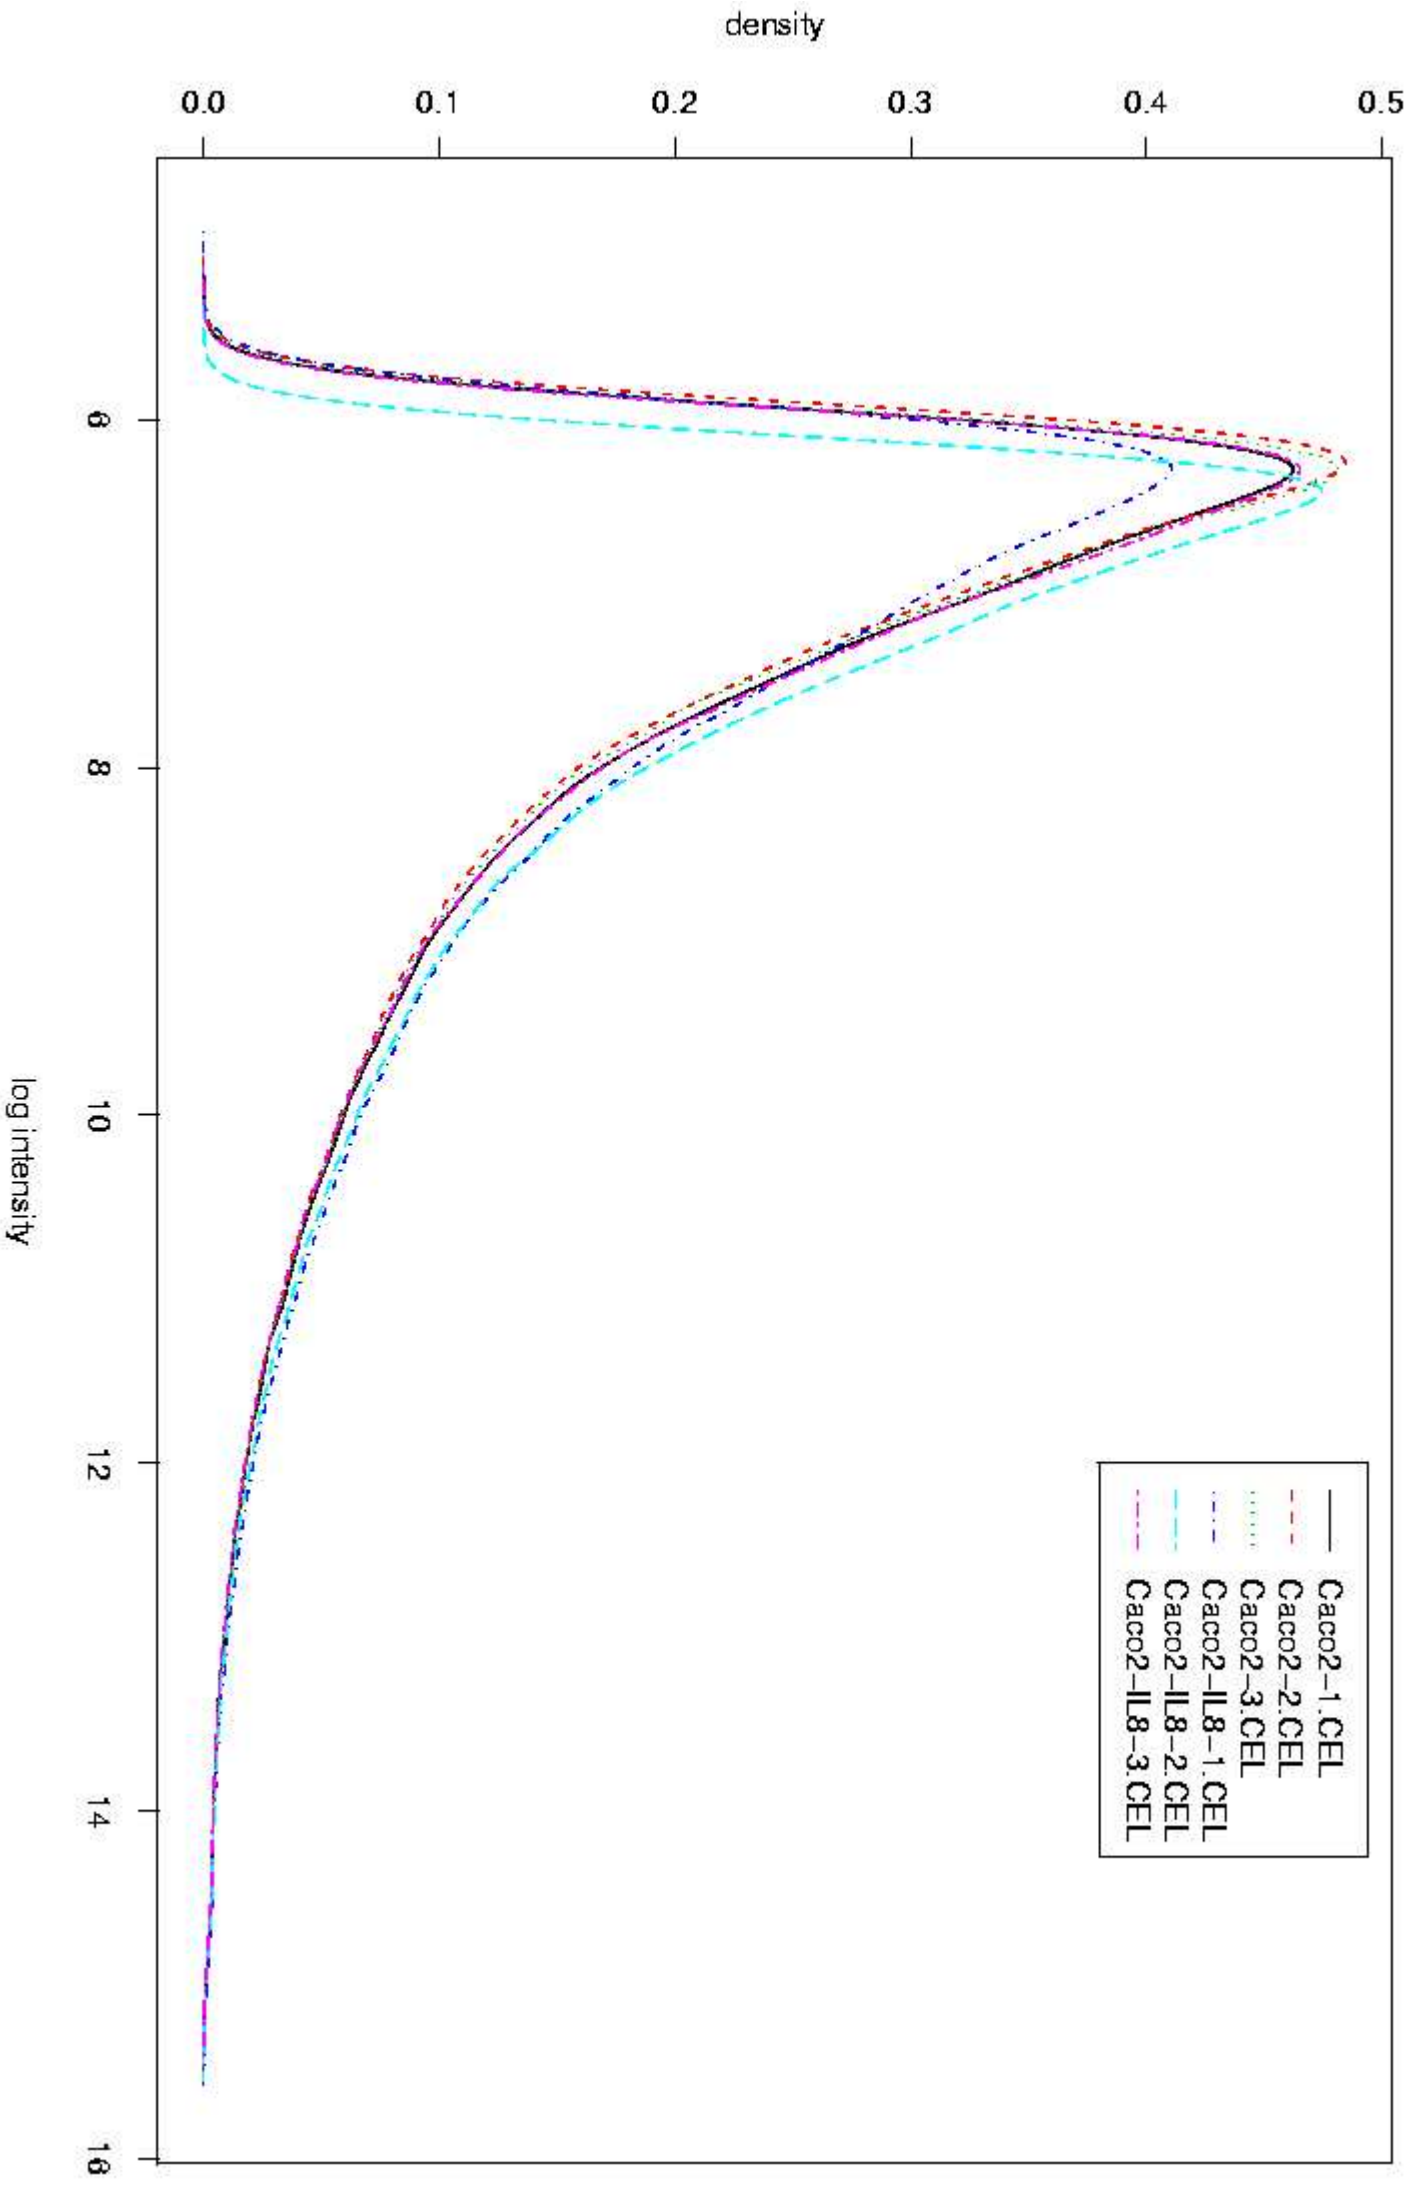

**Boxplot BEFORE normalization. Date: Fri Jan 22 15:01:47 2010**

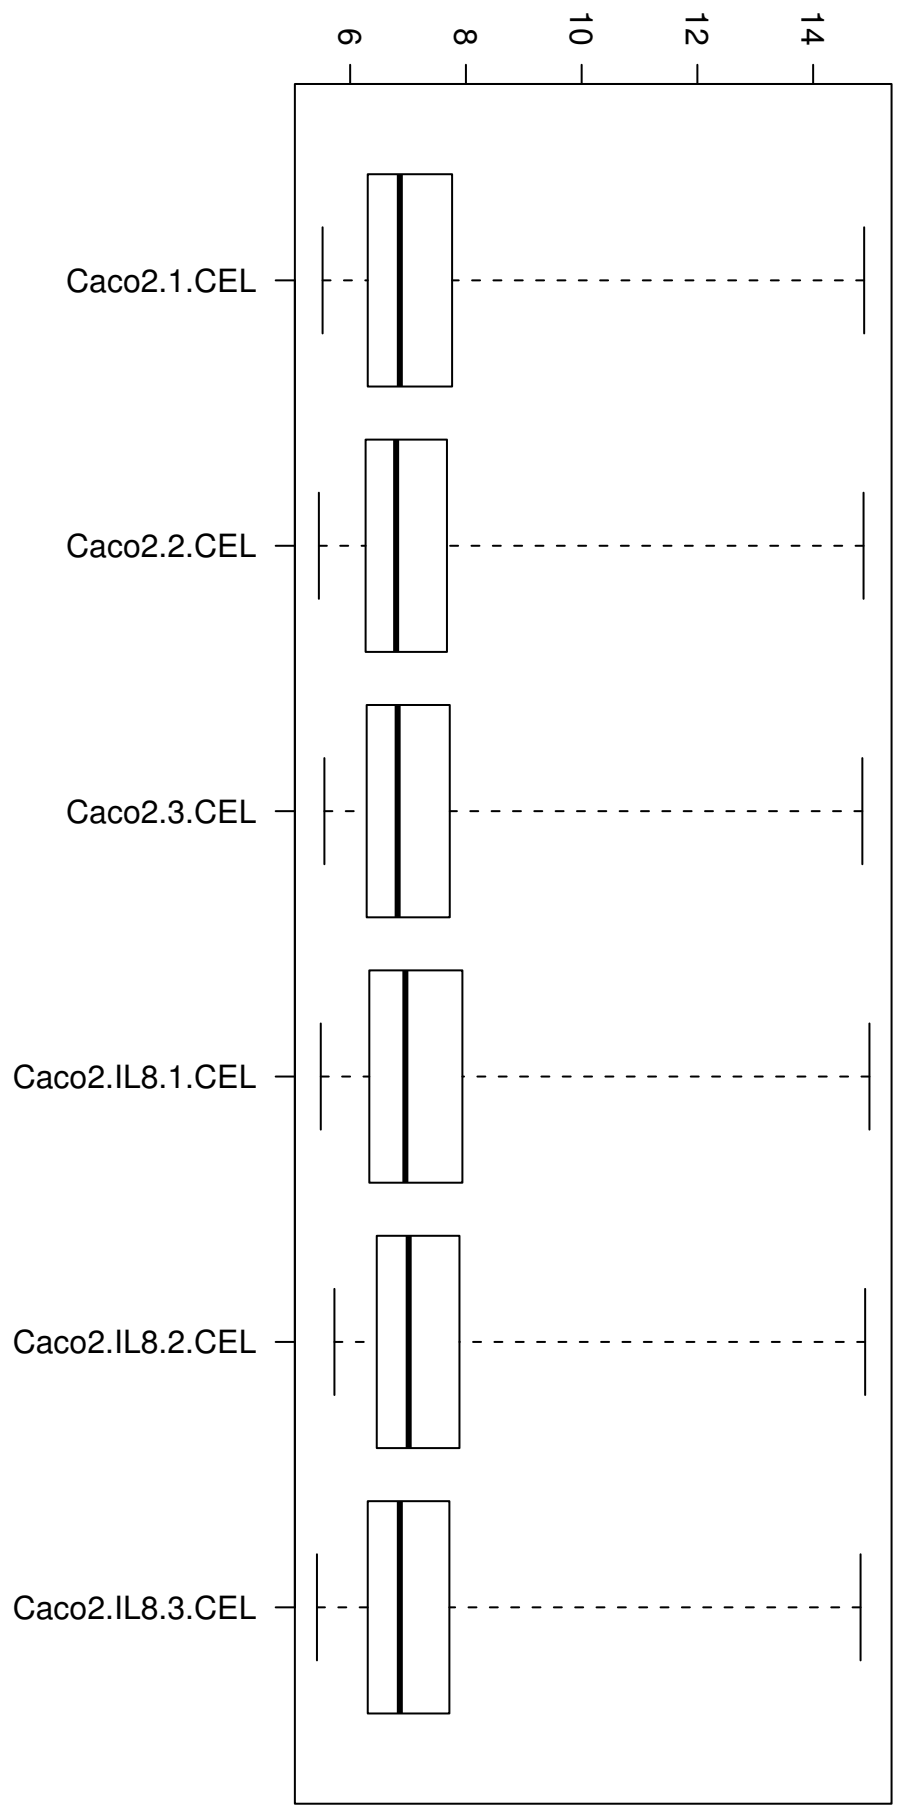



# RNA digestion plot

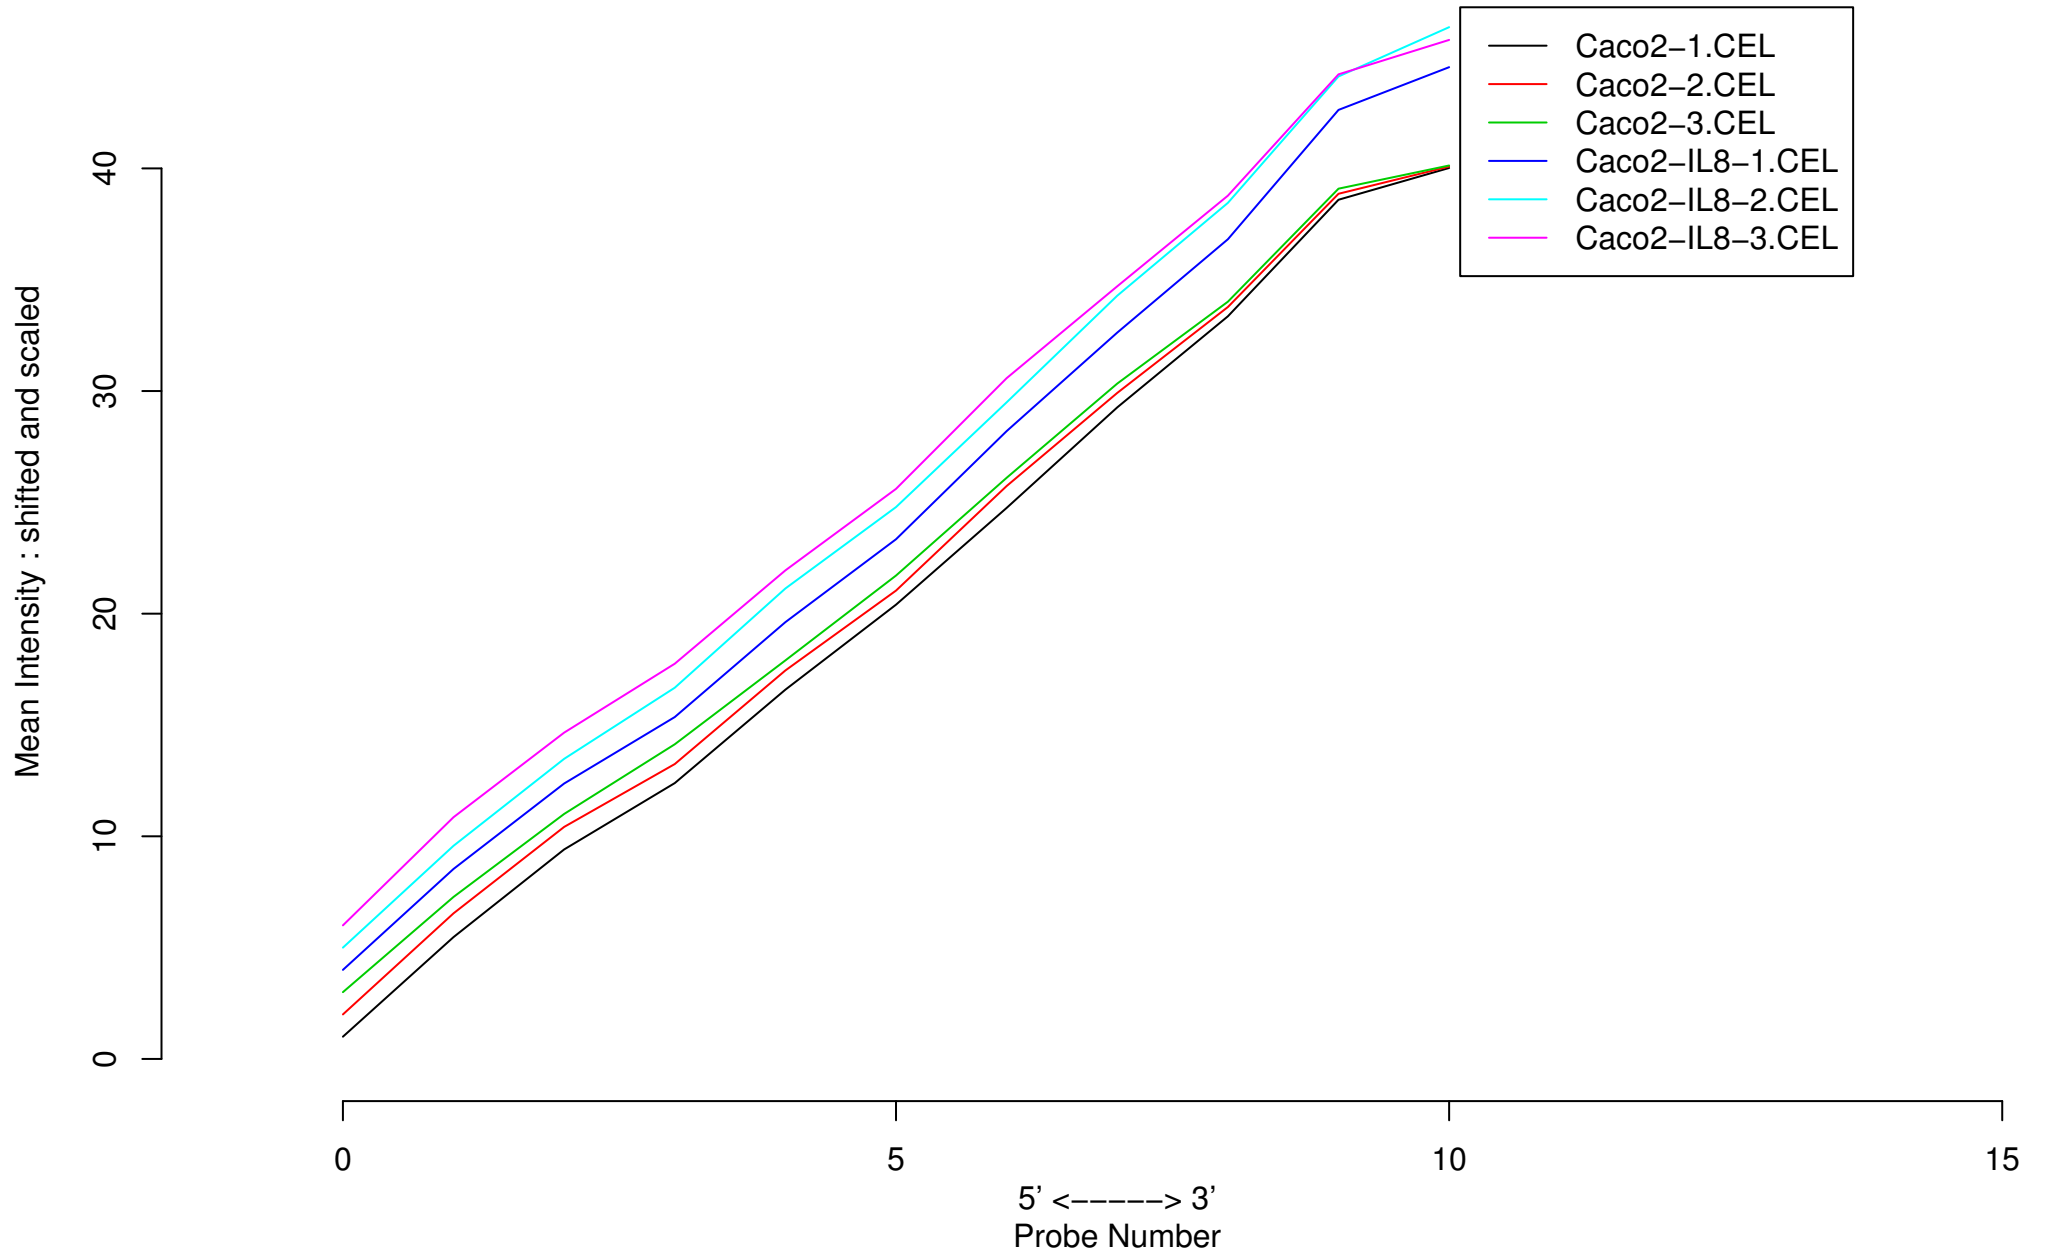

Date: Fri Jan 22 15:04:59 2010.

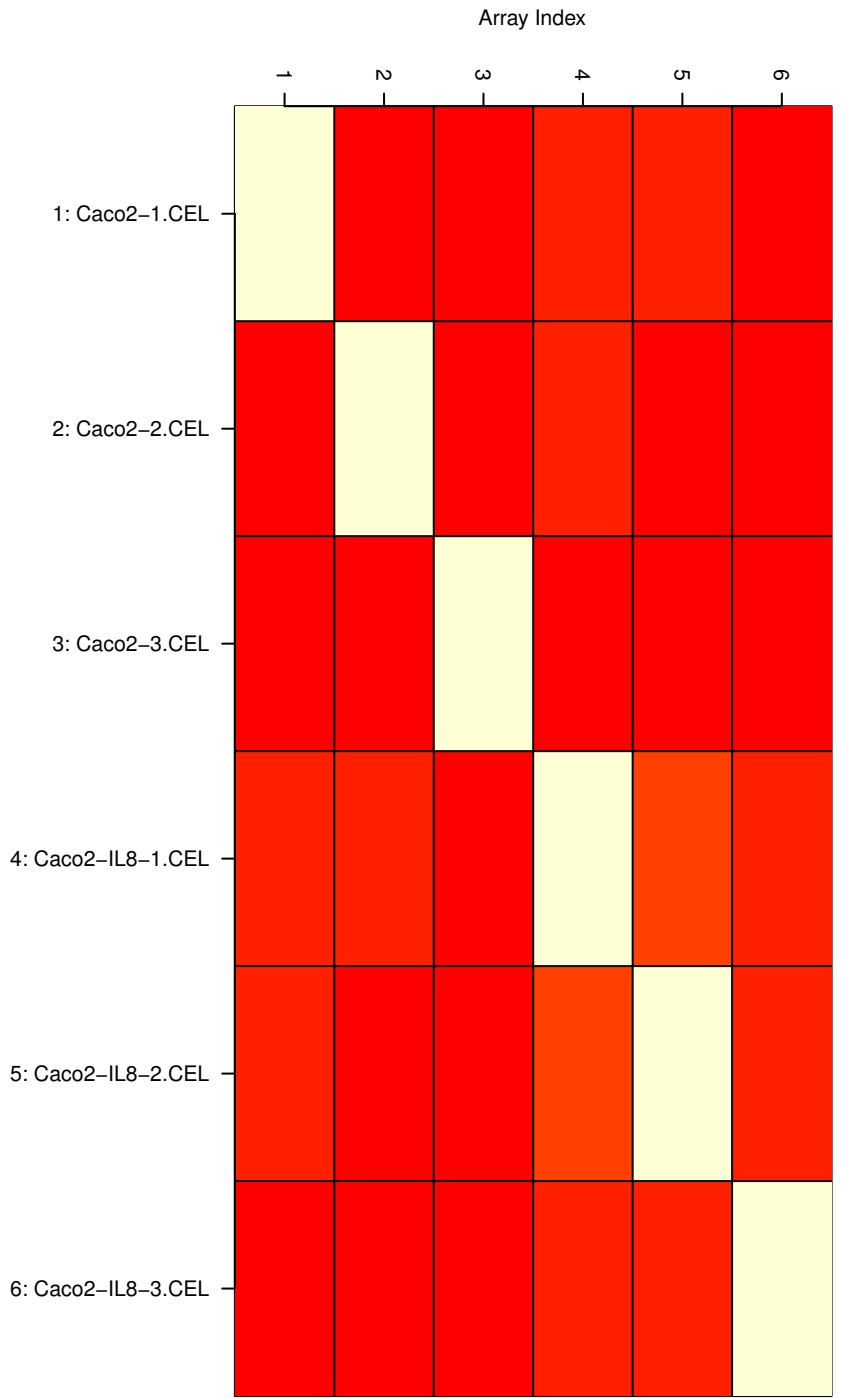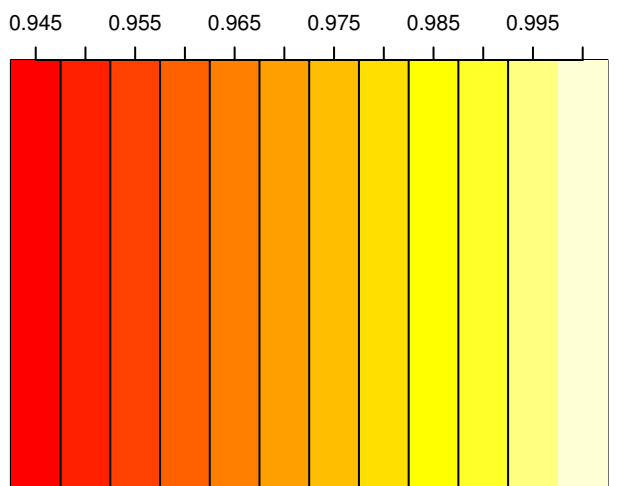

Density plot (1/1) AFTER RMA normalization. Date: Fri Jan 22 15:06:25 2010

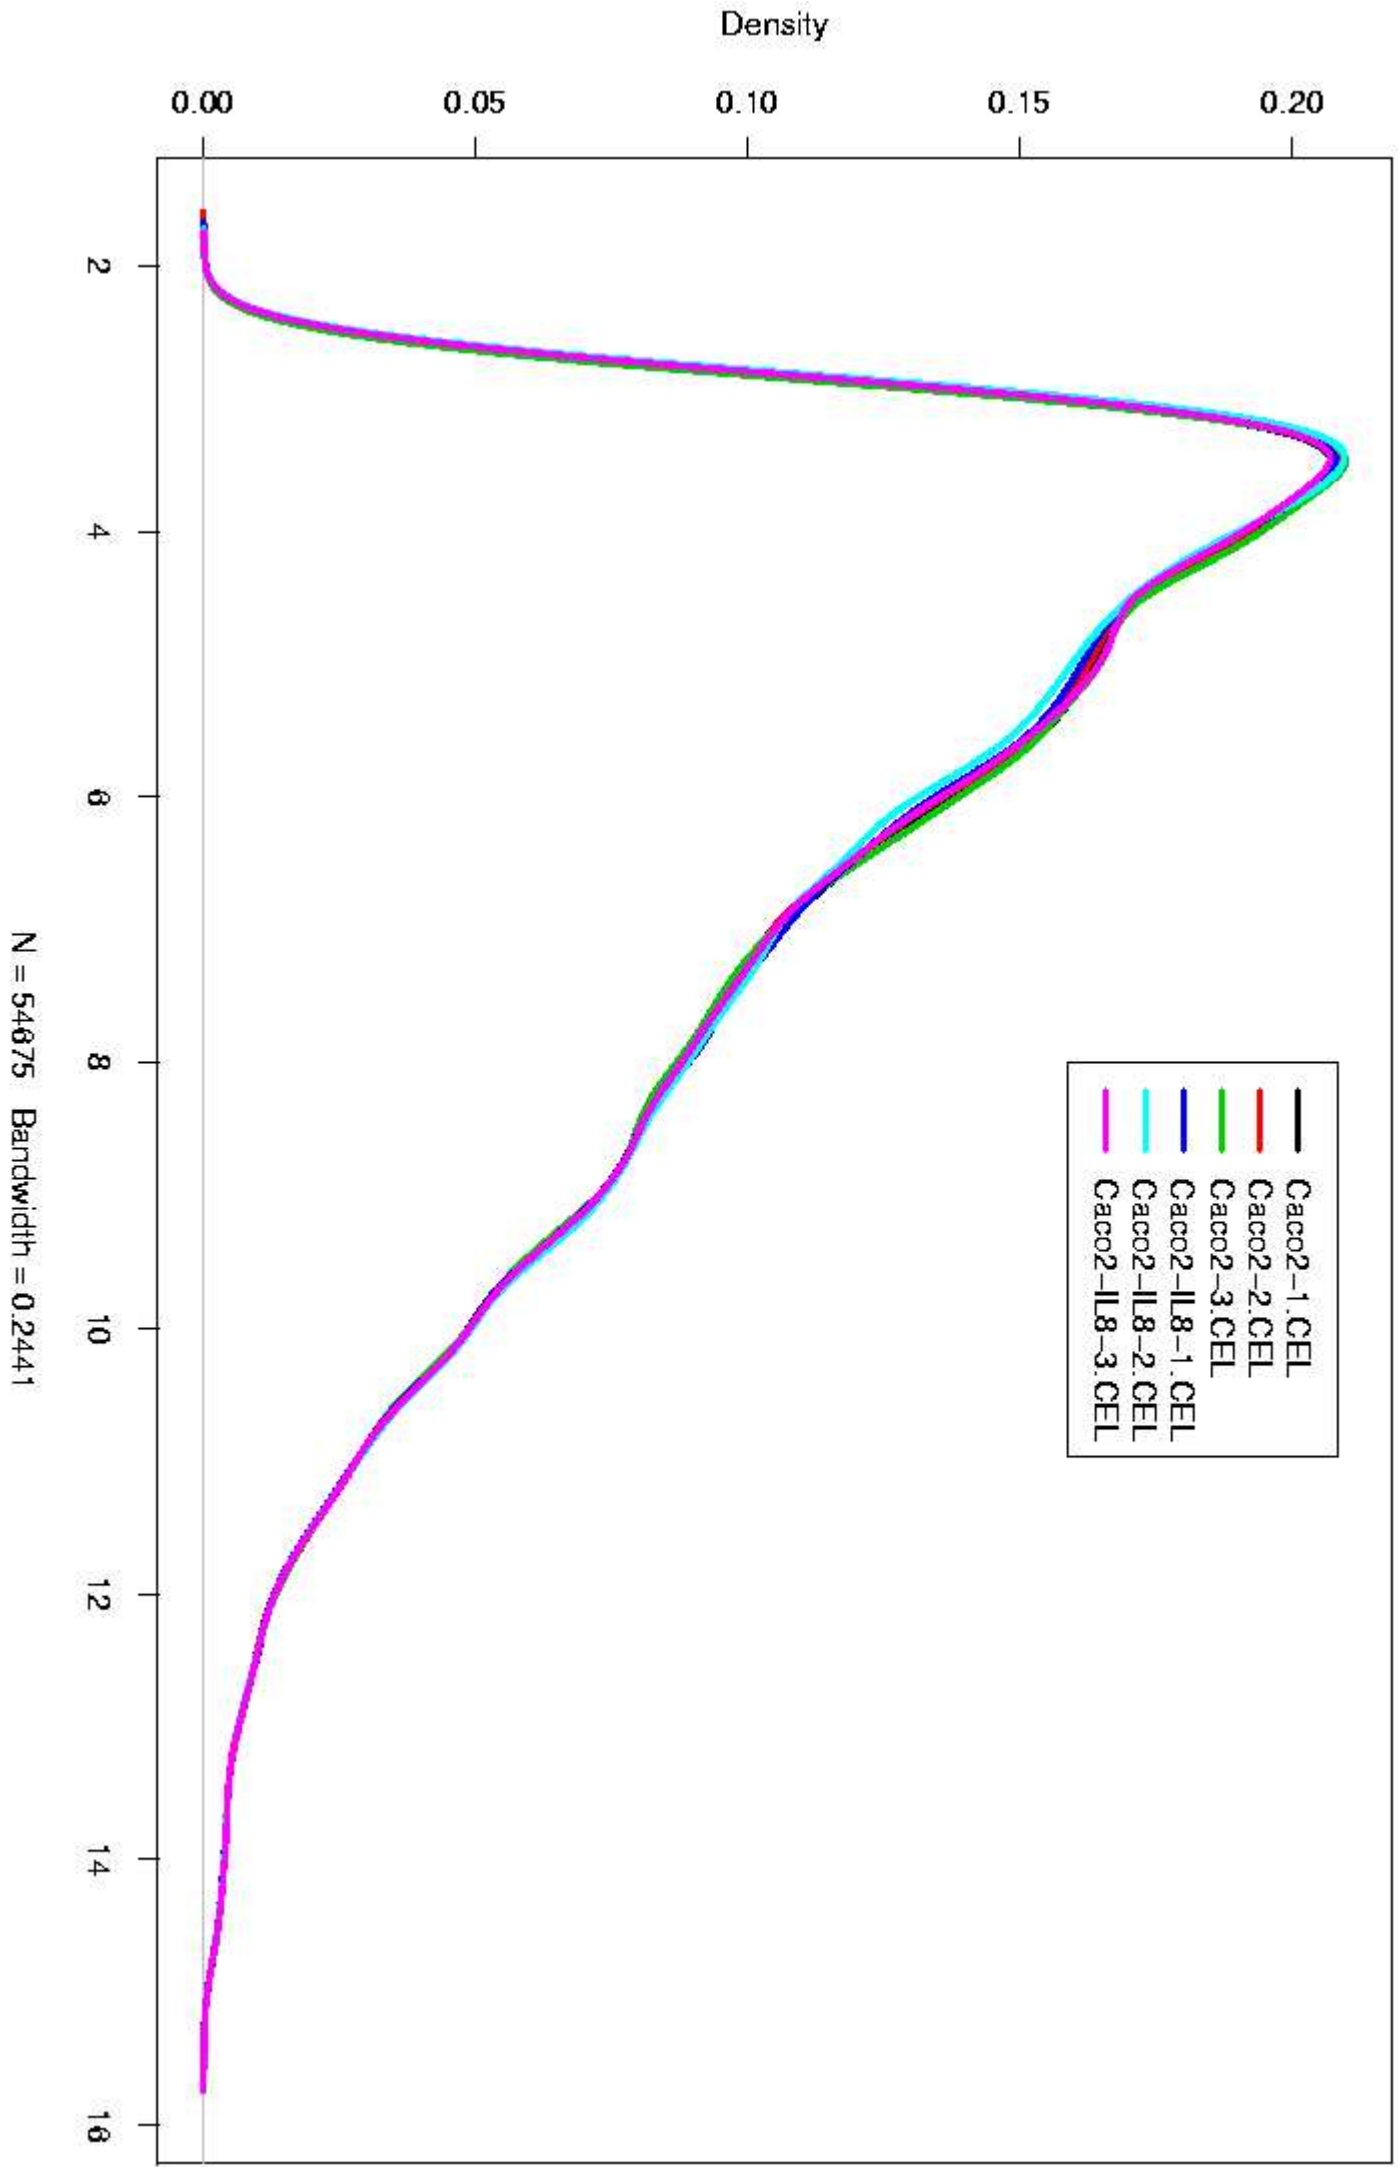



Density plot of ALL arrays AFTER RMA normalization. Date: Fri Jan 22 15:06:27 2010

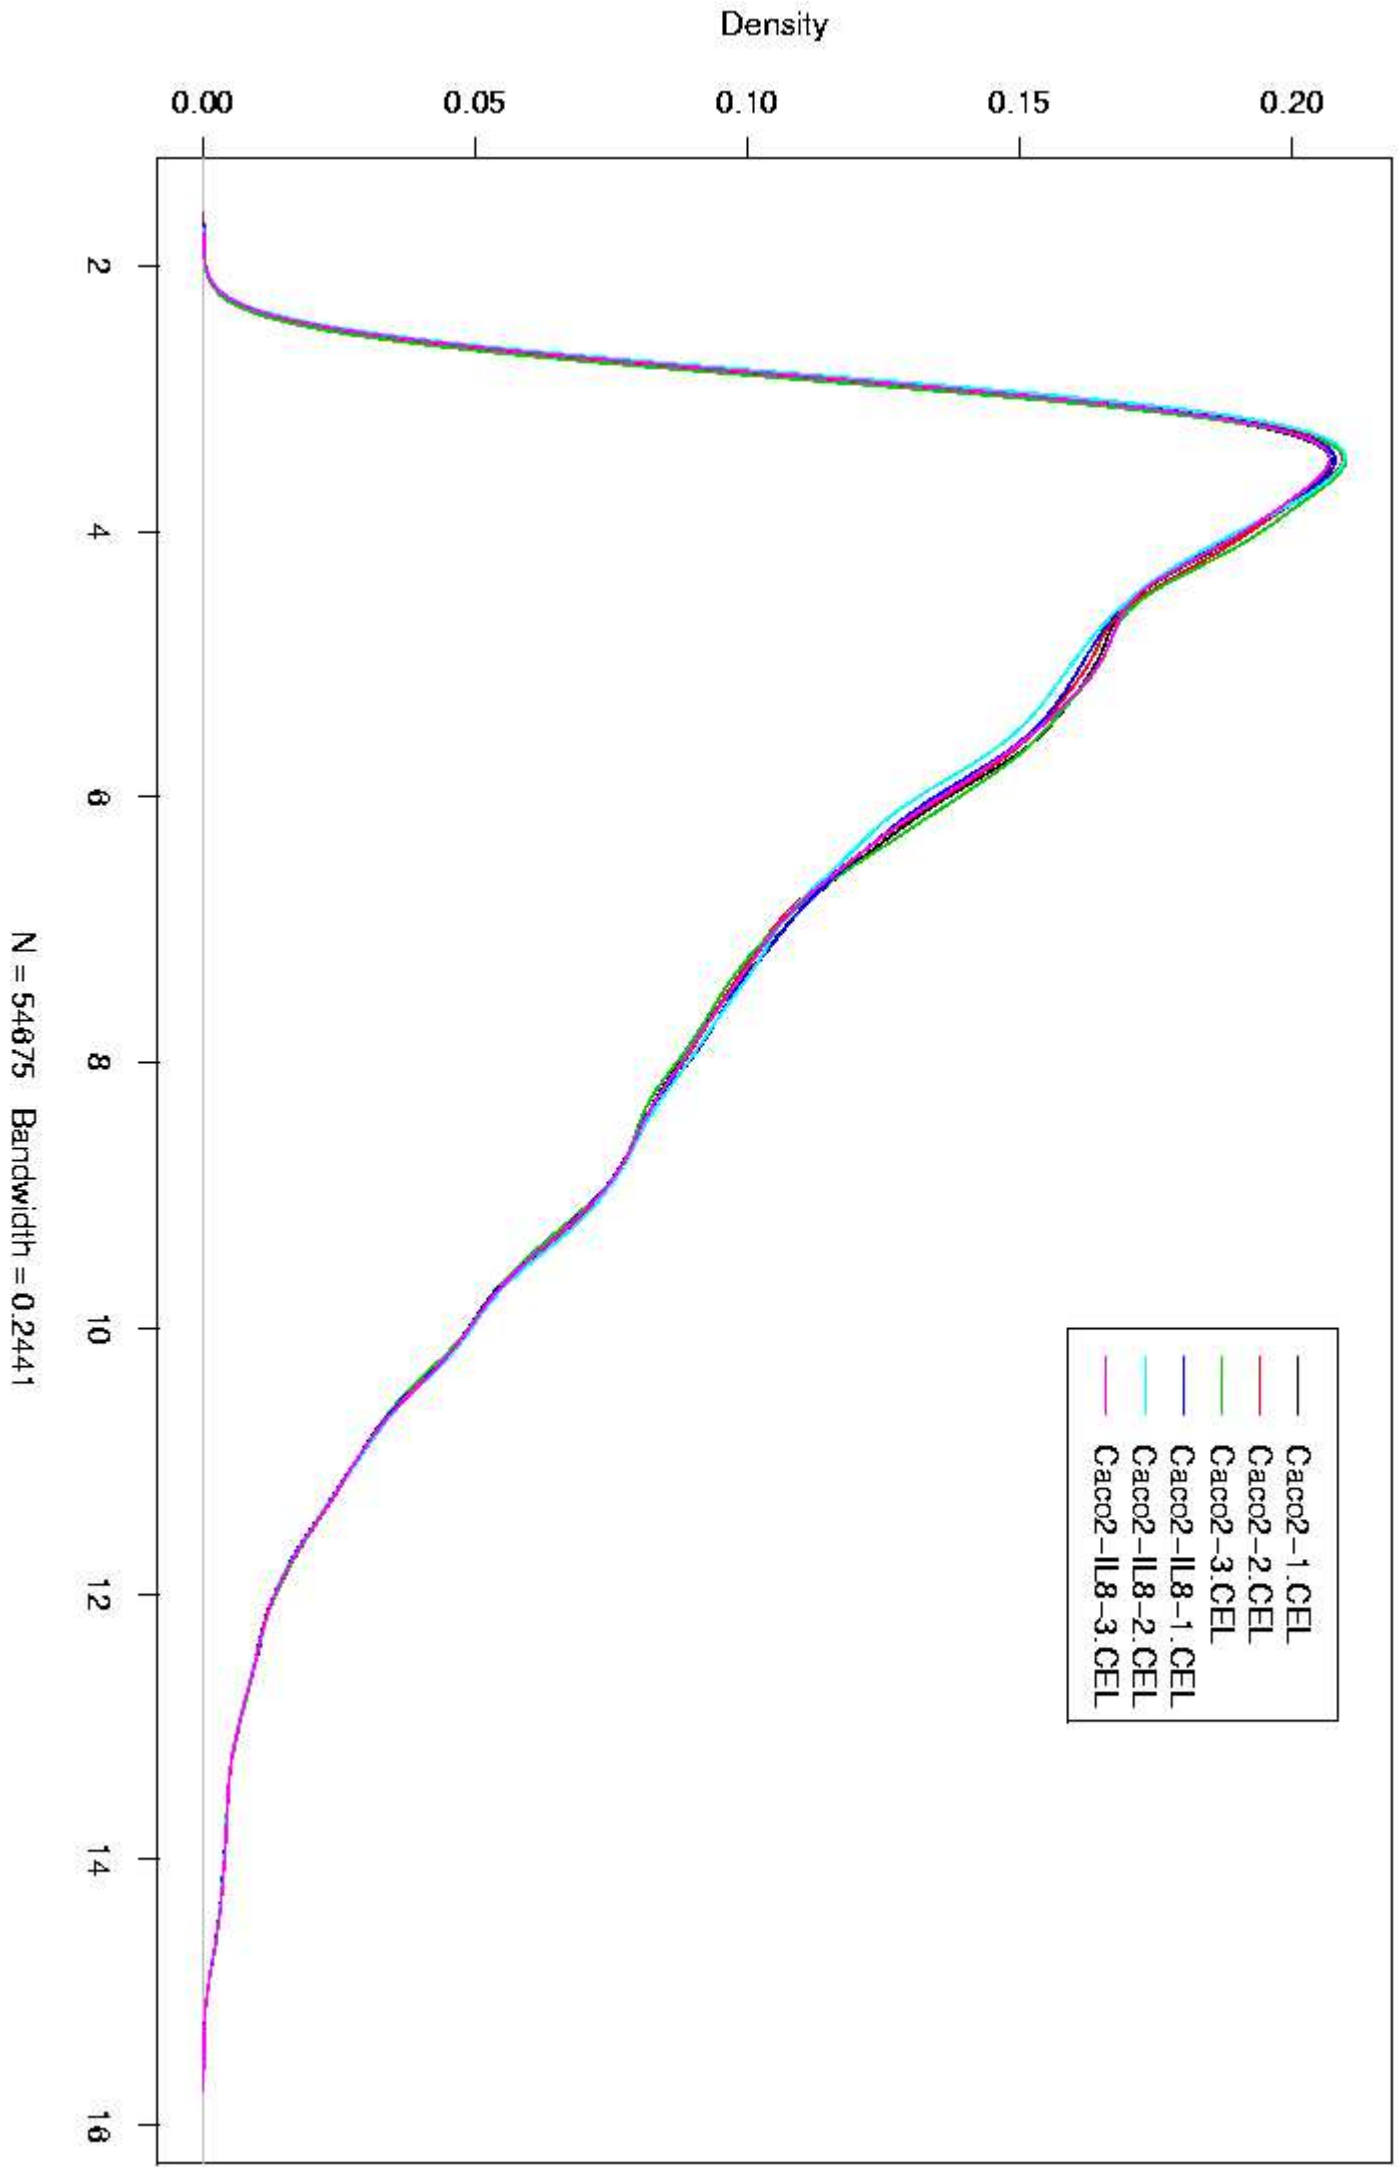

**Boxplot AFTER RMA normalization. Date: Fri Jan 22 15:06:30 2010**

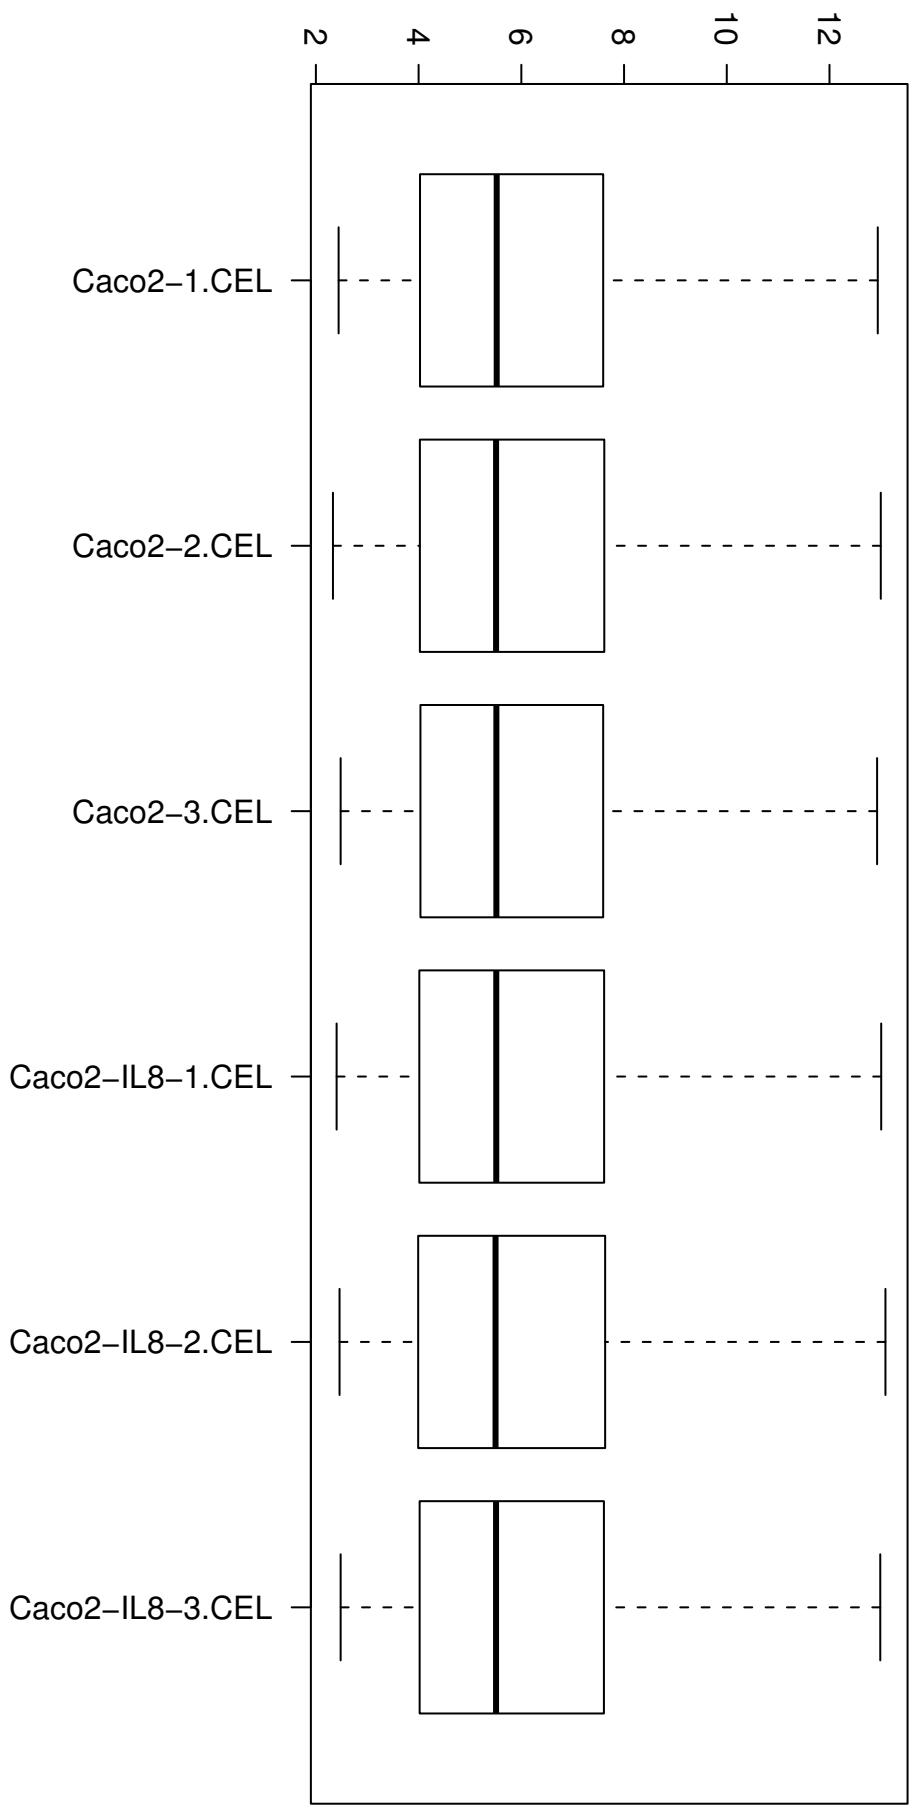

**RLE plot (RMA). Date: Fri Jan 22 14:54:04 2010.**

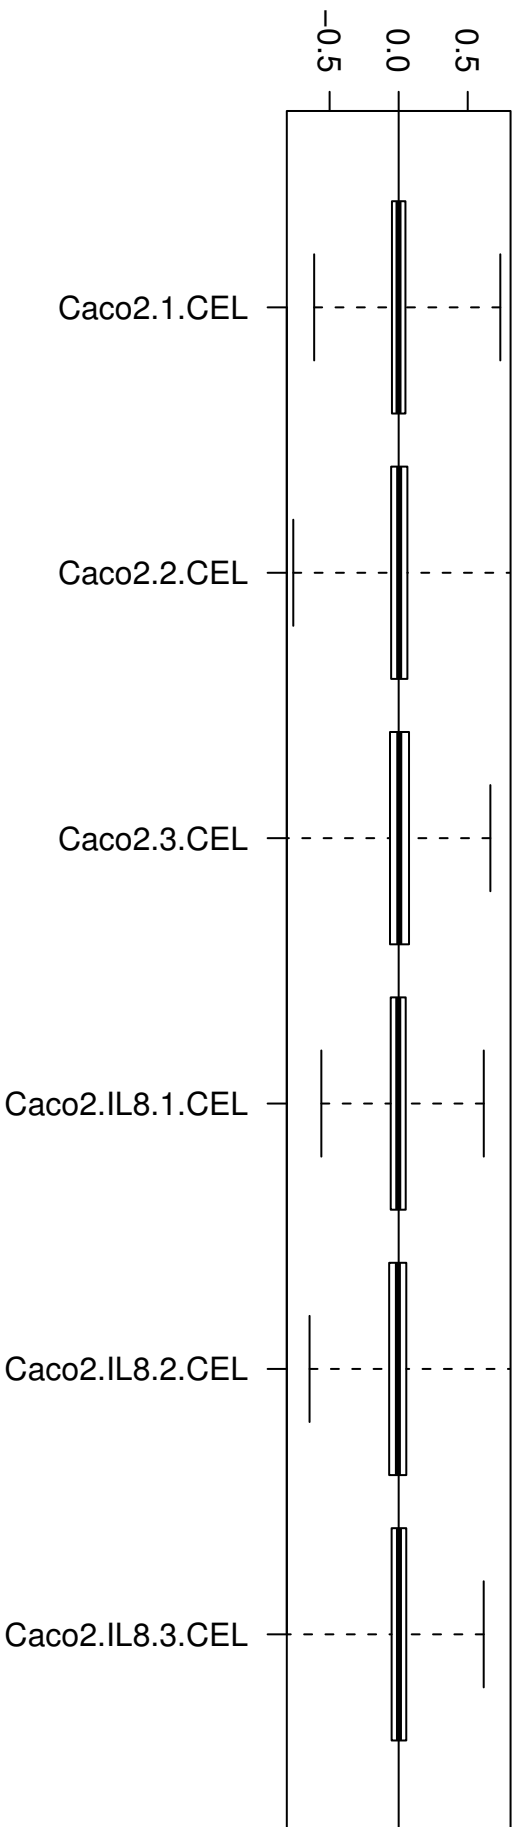

**RLE plot (gcRMA(slow)). Date: Fri Jan 22 15:01:20 2010.**

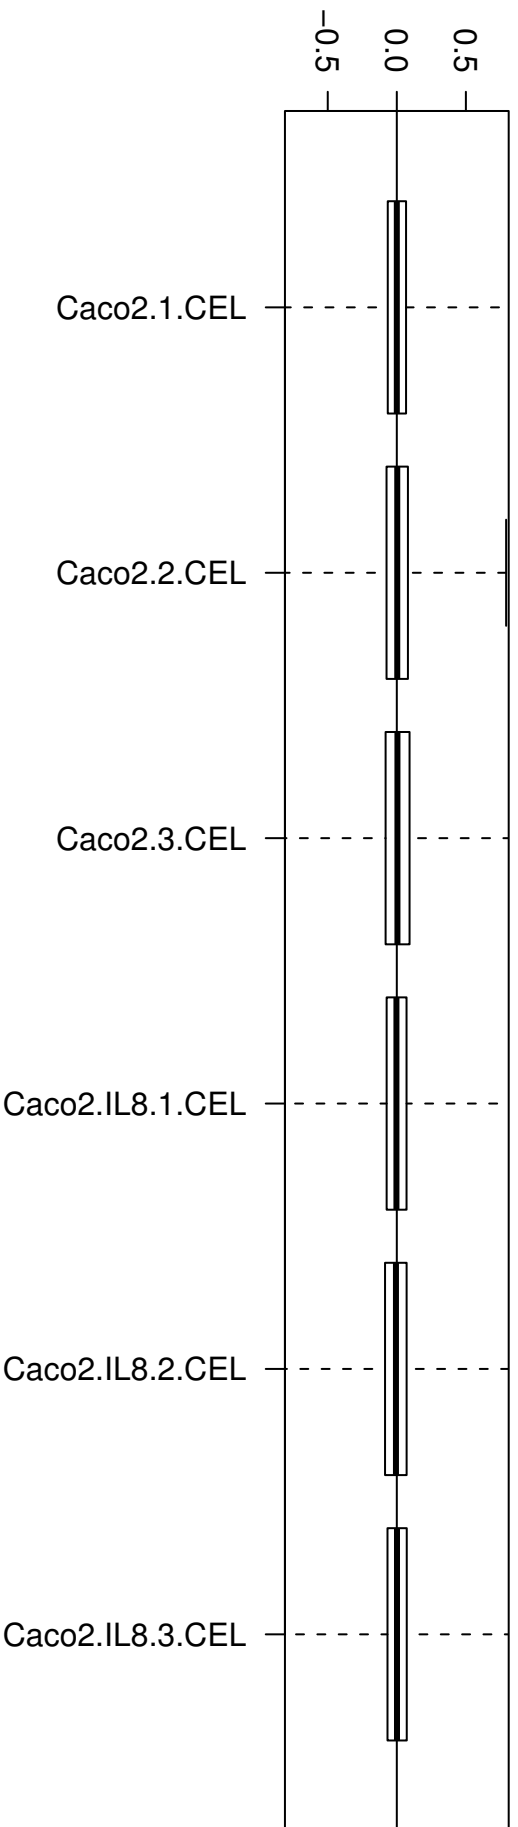



**NUSE plot (RMA). Date: Fri Jan 22 14:54:17 2010.**

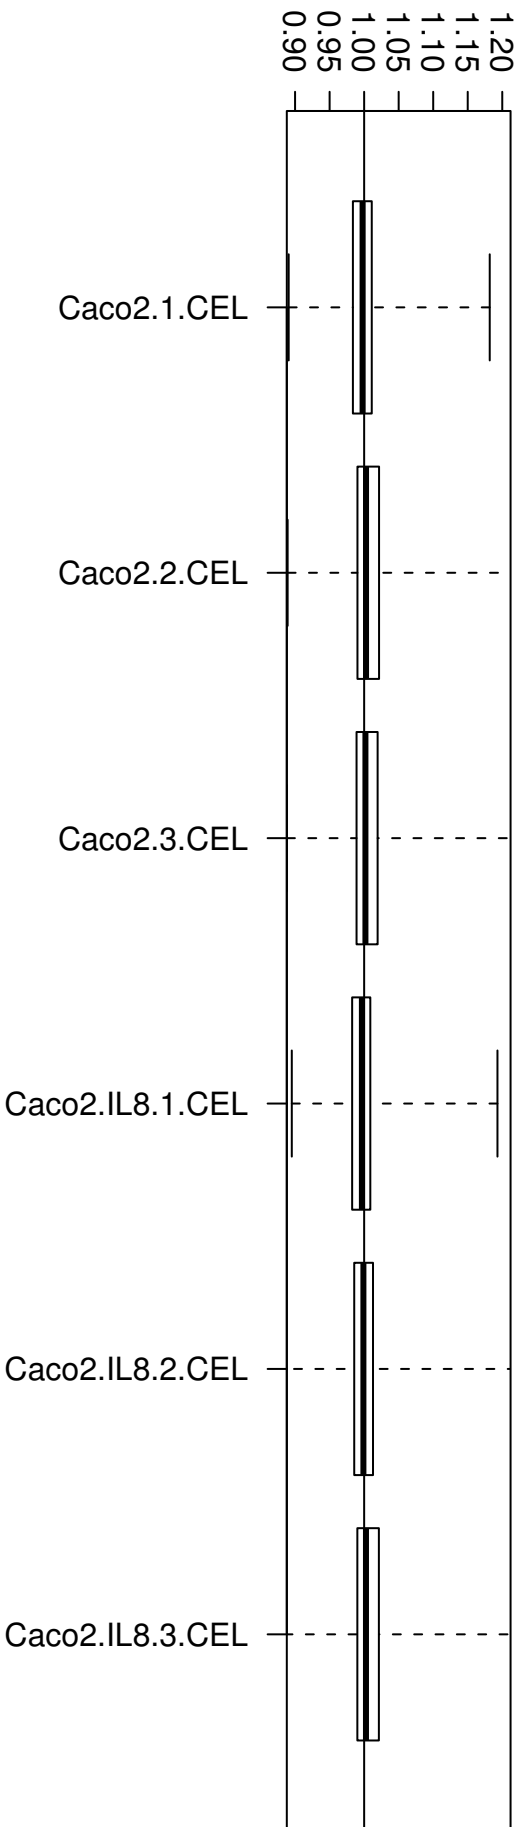

**NUSE plot (gcRMA(slow)). Date: Fri Jan 22 15:01:06 2010.**

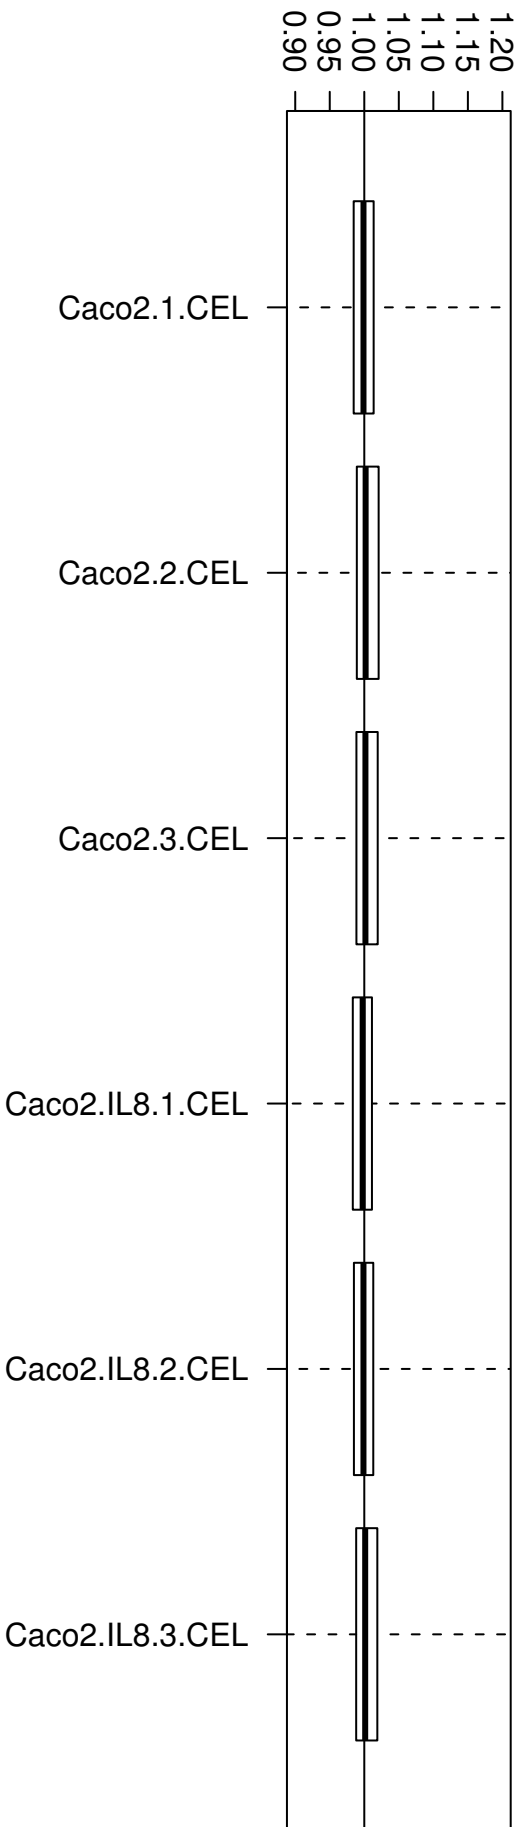

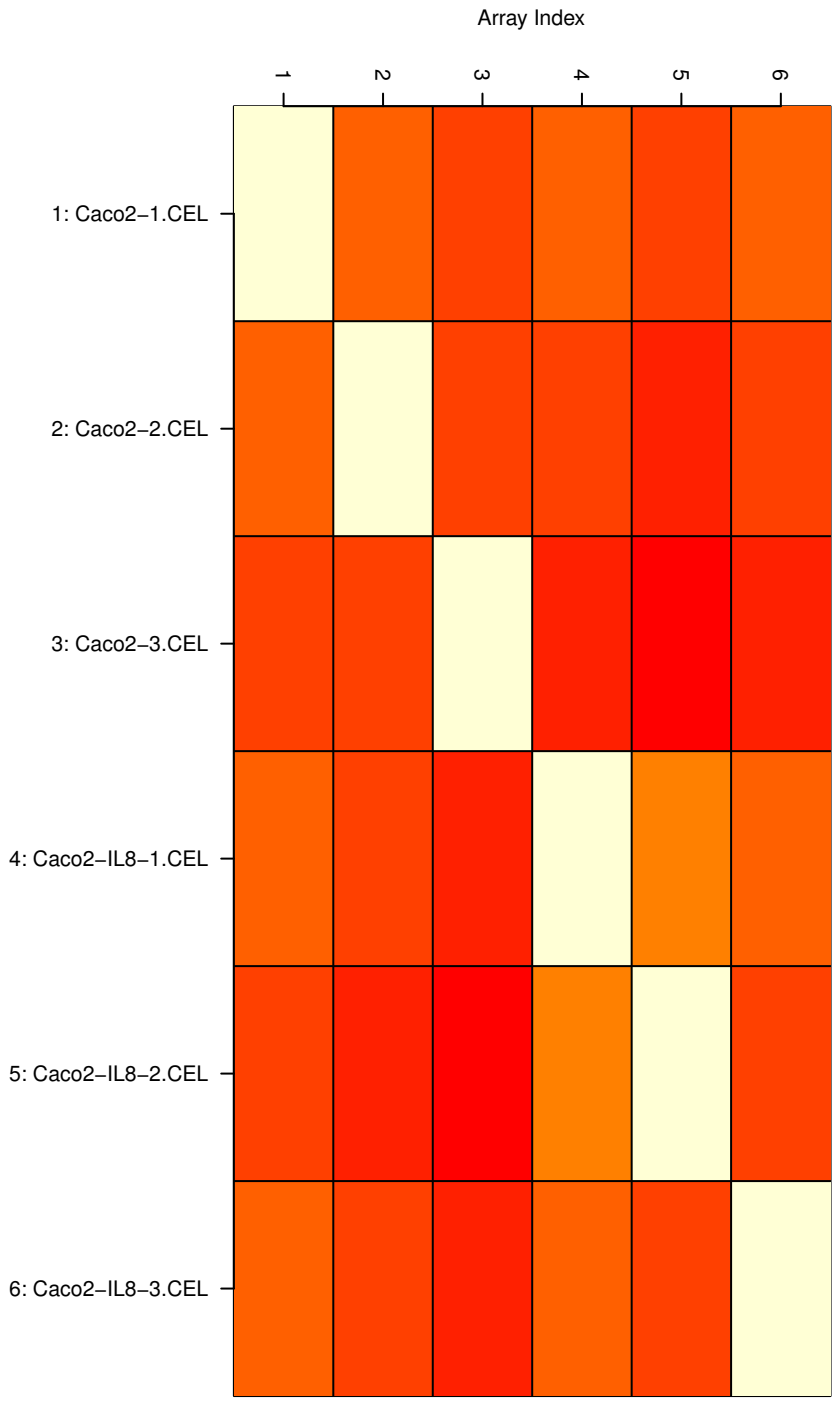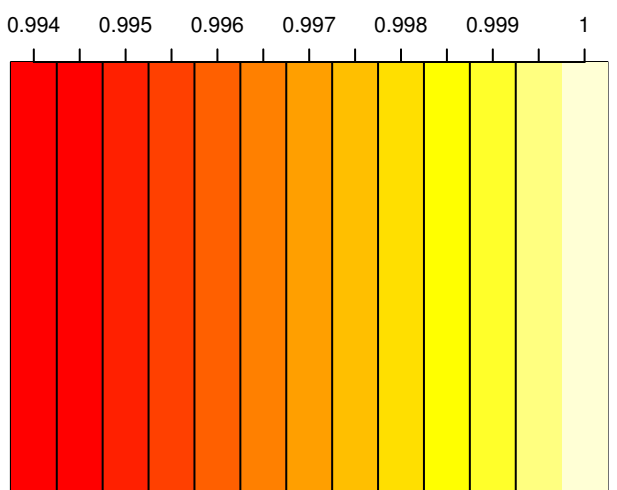

After RMA normalization. Date: Fri Jan 22 15:07:01 2010.

Dendrogram using Ward clustering on the Pearson distance measure (RMA). Date: Fri Jan 22 15:07:02 2010.

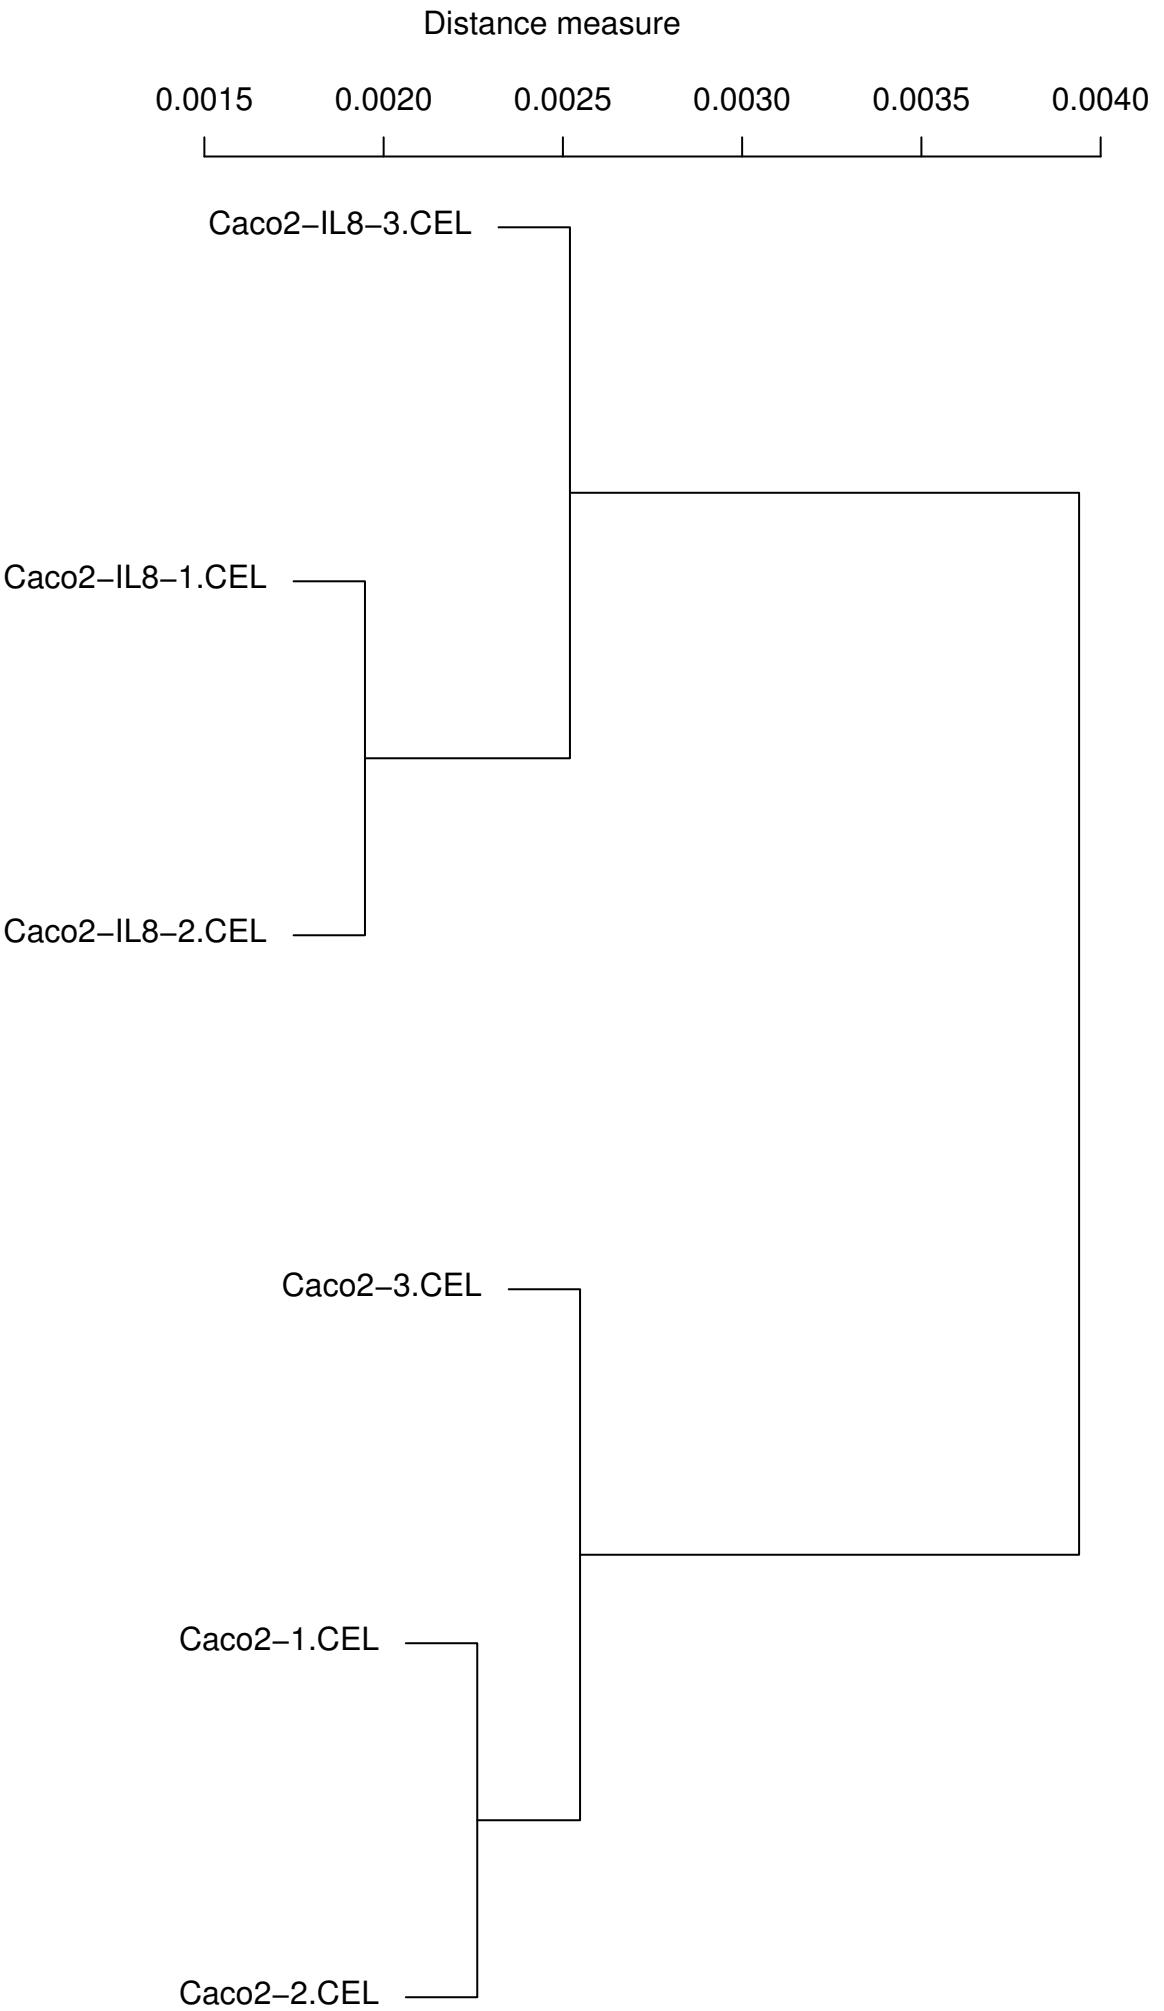

Supplement: 1756-0500-6-431-S1.pdf [file 1756-0500-6-431-S1.pdf]
